# Supplementary material for: Discrimination of Cultivated Regions of Soybeans (Glycine max) Based on Multivariate Data Analysis of Volatile Metabolite Profiles
Source: MDPI journal article supplement (doi:10.3390/molecules25030763), 2020-02-10
Supplement: s1 [file s1]

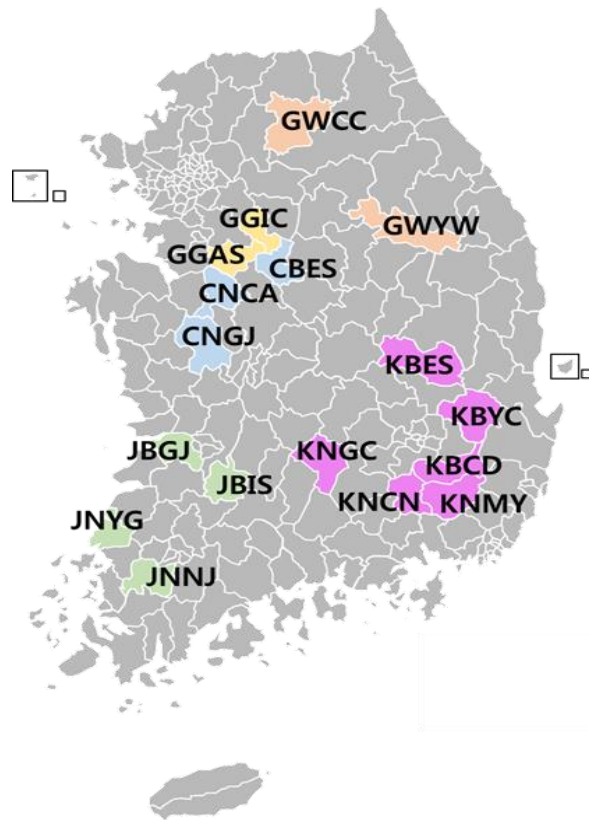

1  
2  
3

Figure S1: Map of Korea

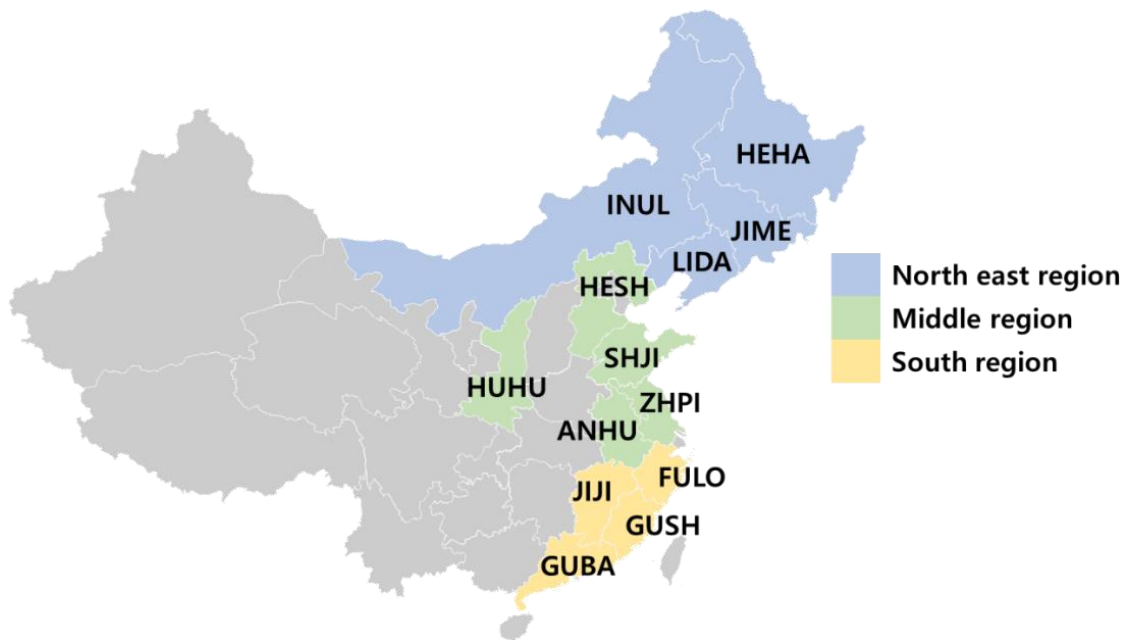

4  
5

Figure S2: Map of China

(a)

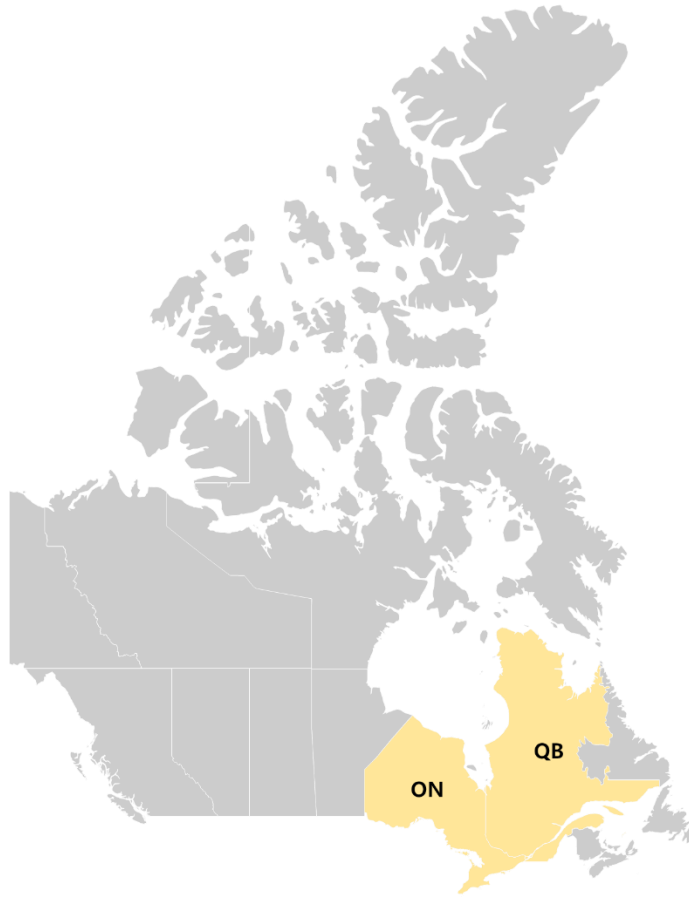

(b)

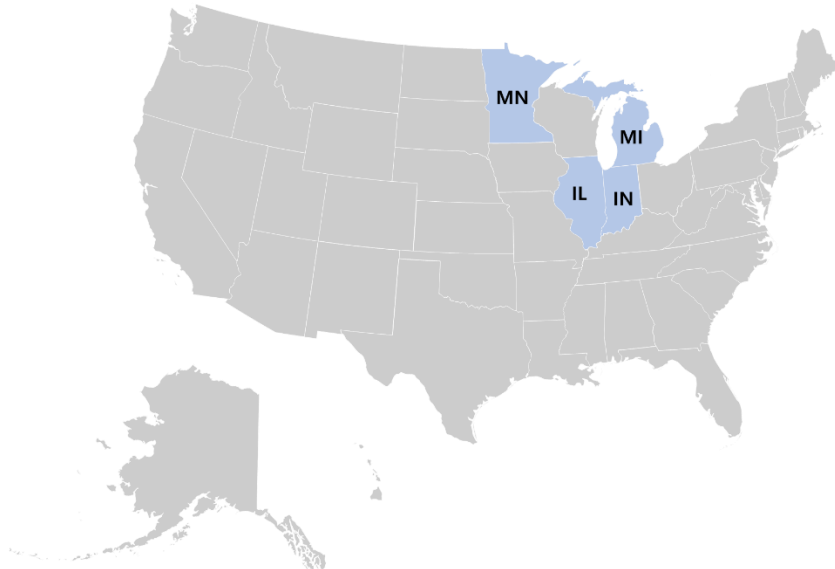

**Figure S3:** Map of North America: (a) Canada, (b) the United States.

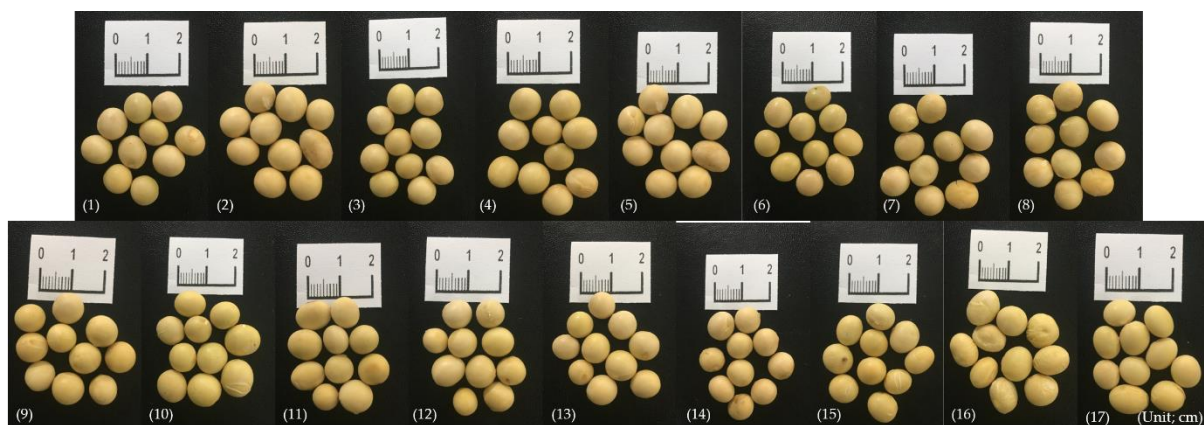

**Fig S4:** Morphological characteristics of the 17 soybean samples cultivation from Korea.; (1) Gyeonggi province Anseong; (2) Gyeonggi province Icheon; (3) Gangwon province Chuncheon; (4) Gangwon province Yeongwol; (5) Chungcheongbuk province Eumseong; (6) Chungcheongnam province Cheonan; (7) Chungcheongnam province Gongju; (8) Jeollabuk province Gimje; (9) Jeollabuk province Imsil; (10) Jeollanam province Naju; (11) Jeollanam province Yeonggwang; (12) Kyeongsangbuk province Cheongdo; (13) Kyeongsangbuk province Uiseong; (14) Kyeongsangbuk province Yeongcheon; (15) Kyeongsangnam province Changnyeong; (16) Kyeongsangnam province Miryang; (17) Kyeongsangnam province Geochang.

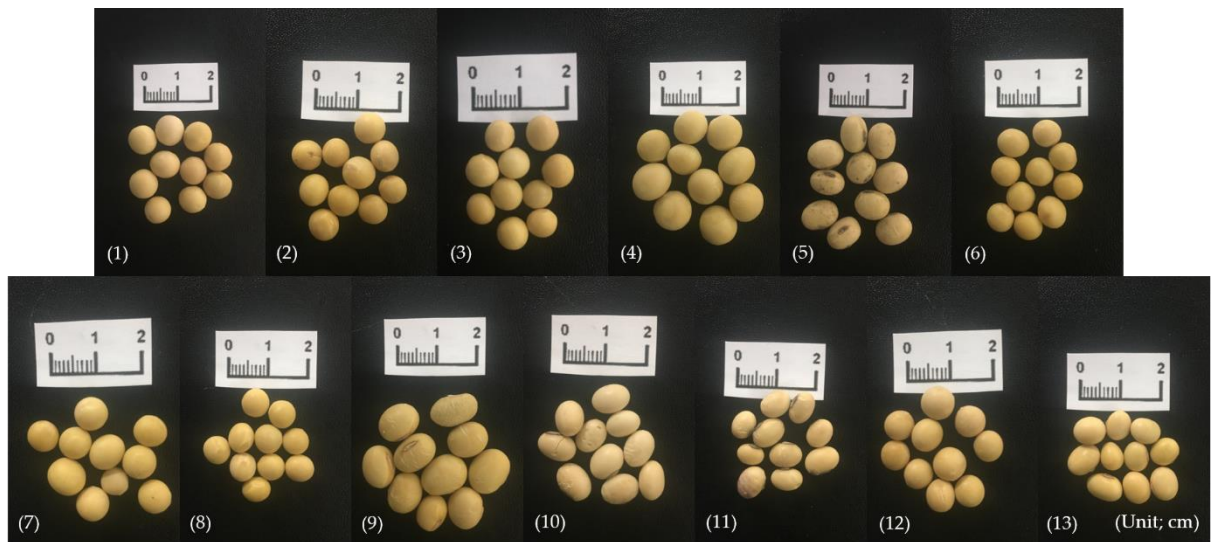

**Fig S5:** Morphological characteristics of the 13 soybean samples cultivation from China.; (1) Neimenggu province Ulanhot; (2) Heilongjiang province Harbin; (3) Jilin province Meihekou; (4) Liaoning province Dandong; (5) Hebei province Shijiazhuang; (6) Shandong province Jining; (7) Anhui province Huaibei; (8) Hubei province Huangshi; (9) Zhejiang province Pinghu; (10) Jiangxi province Jiujiang; (11) Fujian province Longyan; (12) Guangdong province Shaoguan; (13) Guangxi province Hechi.

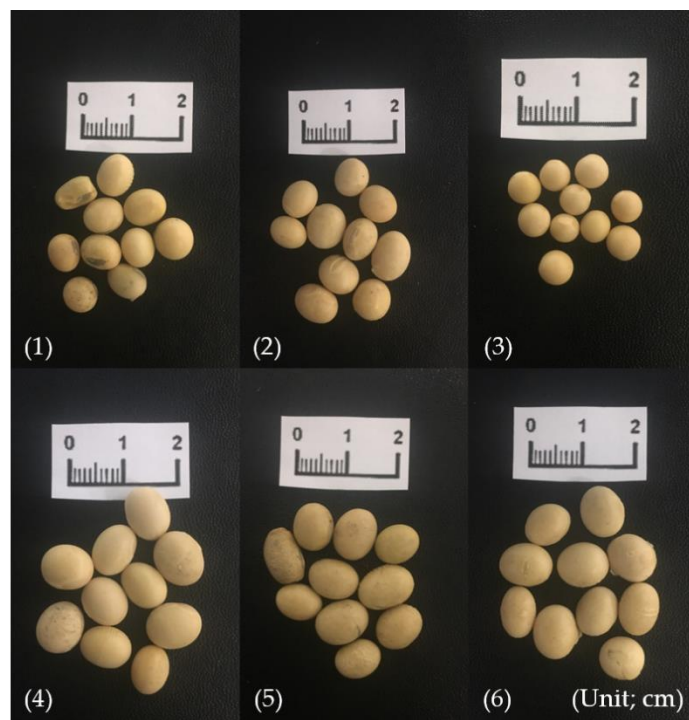

**Fig S6:** Morphological characteristics of the 6 soybean samples cultivation from North America.; (1) Illinois province; (2) Indiana province; (3) Minnesota province; (4) Michigan province; (5) Quebec province; (6) Ontario province.

**Table S1:** Volatile metabolites of soybeans cultivated in Korea

| No. <sup>1</sup> | RI cal <sup>2</sup> | RI ref <sup>3</sup> | Volatile Compounds                    | Relative Peak Area <sup>4</sup> |                  |                  |                 |                 |                 |                  |                 |                  |                  |                 |                 |                             |                 |                 |                 | ID <sup>6</sup> |      |
|------------------|---------------------|---------------------|---------------------------------------|---------------------------------|------------------|------------------|-----------------|-----------------|-----------------|------------------|-----------------|------------------|------------------|-----------------|-----------------|-----------------------------|-----------------|-----------------|-----------------|-----------------|------|
|                  |                     |                     |                                       | CBES <sup>7</sup>               | CNCA             | CNGJ             | GGAS            | GGIC            | GWCC            | GWYW             | JBGJ            | JBIS             | JNNJ             | JNYG            | KBCD            | KBES                        | KBYC            | KNCN            | KNGC            |                 | KNMY |
| <b>Acids</b>     |                     |                     |                                       |                                 |                  |                  |                 |                 |                 |                  |                 |                  |                  |                 |                 |                             |                 |                 |                 |                 |      |
| 1                | 1449                |                     | Acetic acid                           | 1.214<br>±0.100                 | 1.03<br>±0.057   | 0.284<br>±0.057  | 1.1<br>±0.211   | 1.491<br>±0.080 | 1.167<br>±0.160 | 0.898<br>±0.212  | 0.711<br>±0.057 | 0.384<br>±0.136  | 1.241<br>±0.708  | 0.404<br>±0.039 | 0.202<br>±0.039 | N.D. <sup>5</sup><br>±0.126 | 0.376<br>±0.065 | 1.181<br>±0.151 | 0.377<br>±0.013 | 0.098<br>±0.013 | A    |
| <b>Alcohols</b>  |                     |                     |                                       |                                 |                  |                  |                 |                 |                 |                  |                 |                  |                  |                 |                 |                             |                 |                 |                 |                 |      |
| 2                | 924                 |                     | Propan-2-ol                           | N.D.                            | N.D.             | 0.045<br>±0.007  | N.D.            | N.D.            | N.D.            | 0.165<br>±0.233  | N.D.            | N.D.             | 0.045<br>±0.043  | N.D.            | N.D.            | N.D.                        | N.D.            | N.D.            | 0.067<br>±0.022 | N.D.            | A    |
| 3                | 928                 |                     | Ethanol                               | 1.293<br>±0.091                 | 2.099<br>±0.267  | 1.852<br>±0.335  | 1.285<br>±0.18  | 0.495<br>±0.031 | 2.497<br>±0.323 | 5.416<br>±0.462  | 4.1<br>±0.793   | 2.928<br>±1.975  | 5.302<br>±2.205  | 2.052<br>±0.298 | N.D.            | 0.351<br>±0.049             | 1.673<br>±0.718 | N.D.            | 3.123<br>±0.756 | 1.473<br>±0.22  | A    |
| 4                | 1024                |                     | Butan-2-ol                            | 1.089<br>±0.189                 | N.D.             | 1.439<br>±0.146  | N.D.            | 1.291<br>±0.029 | 1.898<br>±0.298 | 1.466<br>±0.157  | N.D.            | N.D.             | N.D.             | 1.248<br>±0.079 | N.D.            | N.D.                        | 0.107<br>±0.185 | N.D.            | N.D.            | N.D.            | A    |
| 5                | 1101                |                     | 2-Methylpropan-1-ol                   | N.D.                            | N.D.             | N.D.             | N.D.            | N.D.            | N.D.            | 0.224<br>±0.006  | N.D.            | N.D.             | N.D.             | N.D.            | N.D.            | 0.063<br>±0.011             | N.D.            | N.D.            | N.D.            | N.D.            | A    |
| 6                | 1129                |                     | 1-Methoxypropan-2-ol                  | 1.464<br>±0.093                 | 1.579<br>±0.03   | 0.769<br>±0.103  | 0.75<br>±0.085  | 1.655<br>±0.09  | 1.233<br>±0.097 | 0.293<br>±0.046  | 0.551<br>±0.025 | 1.292<br>±0.45   | 1.449<br>±0.33   | 1.083<br>±0.07  | 1.309<br>±0.428 | 0.222<br>±0.037             | 0.975<br>±0.257 | 0.443<br>±0.119 | 0.709<br>±0.091 | 3.063<br>±0.34  | A    |
| 7                | 1151                |                     | Butan-1-ol                            | 0.81<br>±0.096                  | 0.279<br>±0.038  | 0.368<br>±0.038  | 0.193<br>±0.04  | 0.745<br>±0.074 | 0.649<br>±0.313 | 1.009<br>±0.109  | 0.188<br>±0.009 | N.D.             | 0.329<br>±0.141  | 0.369<br>±0.009 | 3.35<br>±1.359  | N.D.                        | 0.108<br>±0.188 | 0.499<br>±0.136 | 0.165<br>±0.052 | 0.493<br>±0.118 | A    |
| 8                | 1194                |                     | 2,5-Dimethylhexan-2-ol                | 0.274<br>±0.006                 | 0.227<br>±0.021  | 0.224<br>±0.025  | N.D.            | N.D.            | 0.258<br>±0.027 | 0.275<br>±0.034  | 0.217<br>±0.011 | 0.233<br>±0.009  | 0.27<br>±0.087   | 0.23<br>±0.021  | 0.226<br>±0.144 | 0.356<br>±0.035             | 0.174<br>±0.302 | 0.293<br>±0.013 | 0.313<br>±0.031 | 0.344<br>±0.059 | C    |
| 9                | 1211                |                     | 3-Methylbutan-1-ol                    | N.D.                            | N.D.             | N.D.             | N.D.            | N.D.            | N.D.            | 1.241<br>±0.019  | 0.537<br>±0.05  | N.D.             | 4.1<br>±5.626    | N.D.            | N.D.            | 0.645<br>±0.091             | N.D.            | 1.05<br>±0.059  | N.D.            | N.D.            | A    |
| 10               | 1255                |                     | Pentan-1-ol                           | 0.367<br>±0.019                 | 0.723<br>±0.25   | 0.502<br>±0.038  | 0.507<br>±0.18  | 0.136<br>±0.011 | 0.333<br>±0.018 | 0.301<br>±0.055  | 0.424<br>±0.011 | N.D.             | 1.979<br>±1.892  | 0.332<br>±0.03  | 0.383<br>±0.137 | 0.274<br>±0.021             | 0.476<br>±0.287 | 0.493<br>±0.162 | 0.409<br>±0.086 | 0.728<br>±0.184 | A    |
| 11               | 1304                |                     | 2-Methylpentan-1-ol                   | N.D.                            | 0.152<br>±0.027  | N.D.             | N.D.            | N.D.            | 0.087<br>±0.007 | 0.129<br>±0.002  | 0.069<br>±0.002 | N.D.             | 0.194<br>±0.105  | N.D.            | N.D.            | N.D.                        | 0.21<br>±0.098  | N.D.            | N.D.            | N.D.            | B    |
| 12               | 1344                |                     | Hexan-1-ol                            | 0.568<br>±0.052                 | 1.777<br>±0.467  | 1.566<br>±0.226  | 0.813<br>±0.491 | 0.071<br>±0.007 | 0.209<br>±0.021 | 1.001<br>±0.286  | 1.54<br>±0.100  | 0.604<br>±0.228  | 6.45<br>±7.518   | 0.585<br>±0.07  | 0.465<br>±0.092 | 1.252<br>±0.08              | 0.611<br>±0.65  | 1.938<br>±0.632 | 0.641<br>±0.178 | 2.145<br>±0.046 | A    |
| 13               | 1402                |                     | 2-Butoxyethanol                       | N.D.                            | N.D.             | 0.059<br>±0.012  | N.D.            | 0.054<br>±0.007 | N.D.            | N.D.             | N.D.            | 0.079<br>±0.0100 | N.D.             | N.D.            | N.D.            | N.D.                        | N.D.            | 0.089<br>±0.043 | N.D.            | 0.1<br>±0.035   | A    |
| 14               | 1449                |                     | Oct-1-en-3-ol                         | N.D.                            | N.D.             | N.D.             | N.D.            | N.D.            | N.D.            | N.D.             | N.D.            | N.D.             | N.D.             | N.D.            | N.D.            | 0.674<br>±0.035             | N.D.            | N.D.            | N.D.            | N.D.            | A    |
| 15               | 1493                |                     | 2-Ethylhexan-1-ol                     | 8.806<br>±0.692                 | 10.443<br>±0.929 | 13.104<br>±0.546 | 9.74<br>±1.446  | 5.697<br>±0.23  | 6.864<br>±0.262 | 10.167<br>±0.402 | 8.925<br>±0.309 | 8.434<br>±2.989  | 11.863<br>±1.932 | 5.995<br>±0.502 | 7.06<br>±1.883  | 2.517<br>±0.445             | 4.624<br>±1.299 | 3.85<br>±3.381  | 14.73<br>±0.700 | 8.315<br>±0.577 | A    |
| 16               | 1565                |                     | Octan-1-ol                            | N.D.                            | N.D.             | N.D.             | 0.114<br>±0.027 | 0.043<br>±0.004 | N.D.            | N.D.             | N.D.            | N.D.             | N.D.             | N.D.            | 0.098<br>±0.041 | N.D.                        | 0.095<br>±0.015 | 0.102<br>±0.017 | N.D.            | 0.254<br>±0.021 | A    |
| 17               | 1582                | 1580                | Butane-2,3-diol                       | 0.198<br>±0.021                 | 0.092<br>±0.024  | N.D.             | N.D.            | N.D.            | N.D.            | N.D.             | N.D.            | N.D.             | 0.366<br>±0.560  | N.D.            | N.D.            | N.D.                        | N.D.            | N.D.            | N.D.            | N.D.            | B    |
| 18               | 1643                | 1631                | 5-Methyl-2-propan-2-ylcyclohexan-1-ol | N.D.                            | 0.104<br>±0.011  | N.D.             | 0.068<br>±0.06  | 0.061<br>±0.002 | N.D.            | N.D.             | 0.064<br>±0.020 | N.D.             | N.D.             | N.D.            | N.D.            | N.D.                        | N.D.            | 0.32<br>±0.044  | N.D.            | N.D.            | B    |
| 19               | 1669                |                     | Nonan-1-ol                            | N.D.                            | N.D.             | N.D.             | N.D.            | N.D.            | N.D.            | N.D.             | 0.18<br>±0.017  | N.D.             | N.D.             | N.D.            | N.D.            | 0.055<br>±0.048             | N.D.            | N.D.            | 0.141<br>±0.032 | A               |      |





|                               |      |      |                                          |                 |                 |                 |                 |                 |                 |                 |                 |                 |                 |                 |                 |                 |                 |                 |                 |                 |   |
|-------------------------------|------|------|------------------------------------------|-----------------|-----------------|-----------------|-----------------|-----------------|-----------------|-----------------|-----------------|-----------------|-----------------|-----------------|-----------------|-----------------|-----------------|-----------------|-----------------|-----------------|---|
| 61                            | 1613 |      | Oxolan-2-one                             | 0.22<br>±0.012  | 0.387<br>±0.073 | 0.437<br>±0.603 | 0.146<br>±0.02  | 0.114<br>±0.003 | 0.145<br>±0.015 | 0.215<br>±0.171 | 0.161<br>±0.008 | 0.09<br>±0.04   | 0.589<br>±0.396 | 0.177<br>±0.018 | 0.124<br>±0.027 | 0.429<br>±0.13  | 0.272<br>±0.047 | 0.317<br>±0.063 | 0.196<br>±0.027 | 0.13<br>±0.095  | A |
| 62                            | 1688 | 1694 | 5-Ethylloxolan-2-one                     | N.D.<br>±0.011  | 0.071<br>±0.002 | 0.065<br>±0.002 | 0.098<br>±0.024 | N.D.            | N.D.            | 0.056<br>±0.004 | 0.075<br>±0.006 | N.D.            | 0.137<br>±0.049 | 0.074<br>±0.004 | 0.046<br>±0.007 | 0.041<br>±0.004 | 0.074<br>±0.022 | 0.079<br>±0.020 | N.D.            | 0.189<br>±0.017 | B |
| <b>N-containing compounds</b> |      |      |                                          |                 |                 |                 |                 |                 |                 |                 |                 |                 |                 |                 |                 |                 |                 |                 |                 |                 |   |
| 63                            | <600 |      | N,N-Dimethylmethanamine                  | N.D.            | N.D.            | N.D.            | N.D.            | N.D.            | N.D.            | N.D.            | N.D.            | N.D.            | N.D.            | N.D.            | 0.024<br>±0.005 | N.D.            | 0.038<br>±0.029 | 0.028<br>±0.010 | N.D.            | 0.157<br>±0.012 | A |
| 64                            | 1178 |      | Pyridine                                 | N.D.            | N.D.            | N.D.            | N.D.            | N.D.            | N.D.            | N.D.            | N.D.            | N.D.            | N.D.            | 0.03<br>±0.005  | N.D.            | N.D.            | 0.055<br>±0.051 | N.D.            | N.D.            | N.D.            | A |
| 65                            | 1782 |      | Methyl (Z)-N-hydroxybenzenecarboximidate | 0.058<br>±0.011 | N.D.            | N.D.            | 0.054<br>±0.027 | 0.048<br>±0.015 | N.D.            | N.D.            | N.D.            | N.D.            | N.D.            | N.D.            | 0.095<br>±0.029 | 0.071<br>±0.017 | 0.073<br>±0.052 | N.D.            | N.D.            | N.D.            | C |
| <b>S-containing compounds</b> |      |      |                                          |                 |                 |                 |                 |                 |                 |                 |                 |                 |                 |                 |                 |                 |                 |                 |                 |                 |   |
| 66                            | 716  |      | Methylsulfanylmethane                    | 0.114<br>±0.073 | 0.121<br>±0.01  | 0.083<br>±0.015 | 0.076<br>±0.039 | 0.006<br>±0.002 | 0.029<br>±0.003 | 0.621<br>±0.123 | 0.423<br>±0.08  | 0.053<br>±0.045 | 0.566<br>±0.078 | 0.039<br>±0.003 | 0.033<br>±0.023 | 0.198<br>±0.223 | 0.127<br>±0.041 | 0.221<br>±0.048 | 0.64<br>±0.197  | 0.307<br>±0.069 | A |
| 67                            | 1937 |      | 1,3-Benzothiazole                        | 0.169<br>±0.065 | 0.203<br>±0.102 | 0.14<br>±0.048  | 0.163<br>±0.05  | 0.167<br>±0.011 | 0.156<br>±0.014 | 0.157<br>±0.043 | 0.136<br>±0.006 | 0.232<br>±0.062 | 0.114<br>±0.027 | 0.156<br>±0.027 | 0.415<br>±0.079 | 0.256<br>±0.09  | 0.683<br>±0.239 | 0.388<br>±0.106 | 0.159<br>±0.042 | 0.409<br>±0.219 | A |
| <b>Hydrocarbons</b>           |      |      |                                          |                 |                 |                 |                 |                 |                 |                 |                 |                 |                 |                 |                 |                 |                 |                 |                 |                 |   |
| 68                            | <600 |      | 2-Methylprop-1-ene                       | 0.022<br>±0.002 | 0.035<br>±0.007 | 0.025<br>±0.005 | 0.017<br>±0.005 | 0.022<br>±0.001 | 0.044<br>±0.012 | 0.031<br>±0.004 | 0.022<br>±0.001 | 0.029<br>±0.006 | 0.026<br>±0.006 | 0.043<br>±0.007 | 0.045<br>±0.008 | 0.045<br>±0.005 | 0.043<br>±0.021 | 0.036<br>±0.005 | 0.029<br>±0.003 | 0.036<br>±0.004 | C |
| 69                            | <600 |      | Pentane                                  | N.D.            | 0.026<br>±0.019 | 0.025<br>±0.004 | N.D.            | 0.006<br>±0.001 | 0.011<br>±0.001 | 0.02<br>±0.004  | 0.014<br>±0.000 | N.D.            | 0.225<br>±0.36  | 0.011<br>±0.000 | N.D.            | N.D.            | N.D.            | 0.015<br>±0.001 | 0.011<br>±0.006 | A               |   |
| 70                            | 600  |      | Hexane                                   | 0.048<br>±0.005 | 0.111<br>±0.011 | 0.137<br>±0.066 | 0.059<br>±0.008 | 0.039<br>±0.004 | 0.078<br>±0.025 | 0.101<br>±0.039 | 0.088<br>±0.01  | 0.129<br>±0.108 | 0.187<br>±0.019 | 0.101<br>±0.016 | 0.205<br>±0.052 | N.D.            | N.D.            | 0.157<br>±0.046 | 0.192<br>±0.117 | N.D.            | A |
| 71                            | 613  |      | 1,1-Dichloro-1-fluoroethane              | N.D.            | N.D.            | N.D.            | N.D.            | N.D.            | N.D.            | N.D.            | N.D.            | 0.006<br>±0.01  | N.D.            | N.D.            | 0.011<br>±0.008 | N.D.            | N.D.            | 0.022<br>±0.024 | N.D.            | C               |   |
| 72                            | 700  |      | Heptane                                  | N.D.            | 0.031<br>±0.007 | 0.044<br>±0.024 | 0.033<br>±0.002 | 0.022<br>±0.003 | 0.028<br>±0.004 | 0.044<br>±0.008 | 0.027<br>±0.003 | 0.03<br>±0.006  | 0.05<br>±0.005  | 0.023<br>±0.001 | 0.022<br>±0.007 | 0.023<br>±0.002 | 0.036<br>±0.018 | 0.022<br>±0.005 | 0.04<br>±0.003  | 0.035<br>±0.005 | A |
| 73                            | 735  | 725  | Methylcyclohexane                        | N.D.            | N.D.            | N.D.            | N.D.            | N.D.            | N.D.            | N.D.            | N.D.            | N.D.            | N.D.            | 0.002<br>±0.004 | 0.013<br>±0.005 | 0.017<br>±0.001 | N.D.            | N.D.            | 0.015<br>±0.004 | B               |   |
| 74                            | 800  |      | Octane                                   | 0.025<br>±0.004 | 0.03<br>±0.005  | 0.043<br>±0.046 | 0.045<br>±0.007 | N.D.            | 0.013<br>±0.002 | 0.037<br>±0.003 | 0.024<br>±0.003 | 0.023<br>±0.011 | 0.083<br>±0.029 | 0.012<br>±0.001 | 0.028<br>±0.011 | 0.021<br>±0.003 | 0.043<br>±0.033 | 0.031<br>±0.01  | 0.068<br>±0.028 | 0.056<br>±0.006 | A |
| 75                            | 1198 |      | Dodecane                                 | 0.05<br>±0.087  | N.D.            | N.D.            | N.D.            | N.D.            | N.D.            | N.D.            | N.D.            | N.D.            | N.D.            | 0.256<br>±0.135 | 0.108<br>±0.027 | 0.24<br>±0.041  | 0.17<br>±0.082  | N.D.            | 0.161<br>±0.015 | A               |   |
| 76                            | 1277 |      | Pentylcyclopentane                       | N.D.            | N.D.            | N.D.            | N.D.            | N.D.            | N.D.            | N.D.            | N.D.            | N.D.            | N.D.            | 0.022<br>±0.037 | N.D.            | N.D.            | 0.178<br>±0.118 | N.D.            | N.D.            | C               |   |
| 77                            | 1399 | 1400 | Tetradecane                              | N.D.            | N.D.            | N.D.            | N.D.            | N.D.            | N.D.            | N.D.            | N.D.            | 0.042<br>±0.058 | N.D.            | N.D.            | 0.111<br>±0.073 | 0.072<br>±0.012 | 0.094<br>±0.038 | 0.057<br>±0.002 | N.D.            | 0.107<br>±0.008 | B |
| <b>Terpenes</b>               |      |      |                                          |                 |                 |                 |                 |                 |                 |                 |                 |                 |                 |                 |                 |                 |                 |                 |                 |                 |   |
| 78                            | 1092 |      | β-Pinene                                 | N.D.            | N.D.            | 0.097<br>±0.014 | N.D.            | N.D.            | N.D.            | N.D.            | N.D.            | N.D.            | N.D.            | N.D.            | N.D.            | N.D.            | N.D.            | N.D.            | N.D.            | N.D.            | A |
| 79                            | 1157 |      | l-Phellandrene                           | 0.087<br>±0.039 | N.D.            | N.D.            | N.D.            | N.D.            | N.D.            | N.D.            | N.D.            | N.D.            | N.D.            | N.D.            | N.D.            | N.D.            | N.D.            | N.D.            | N.D.            | N.D.            | A |
| 80                            | 1190 |      | Limonene                                 | 0.039<br>±0.011 | N.D.            | 0.028<br>±0.003 | N.D.            | N.D.            | N.D.            | N.D.            | N.D.            | N.D.            | 0.196<br>±0.132 | N.D.            | 0.43<br>±0.519  | N.D.            | 0.134<br>±0.231 | 0.127<br>±0.083 | N.D.            | 0.065<br>±0.022 | A |
| 81                            | 1198 |      | Sabinene                                 | 0.142           | N.D.            | N.D.            | N.D.            | N.D.            | N.D.            | N.D.            | N.D.            | N.D.            | N.D.            | 0.042           | N.D.            | 0.022           | N.D.            | N.D.            | N.D.            | N.D.            | A |



|                |      |      |                     |             |      |      |      |                        |                        |                        |      |      |      |      |             |                       |                       |                        |      |      |                        |   |
|----------------|------|------|---------------------|-------------|------|------|------|------------------------|------------------------|------------------------|------|------|------|------|-------------|-----------------------|-----------------------|------------------------|------|------|------------------------|---|
| 82             | 1243 |      | $\gamma$ -Terpinene | $\pm 0.143$ | N.D. | N.D. | N.D. | N.D.                   | N.D.                   | N.D.                   | N.D. | N.D. | N.D. | N.D. | $\pm 0.072$ | $\pm 0.038$           | N.D.                  | N.D.                   | N.D. | N.D. | A                      |   |
| 83             | 1736 | 1736 | Azulene             |             | N.D. | N.D. | N.D. | N.D.                   | N.D.                   | N.D.                   | N.D. | N.D. | N.D. | N.D. | N.D.        | N.D.                  | N.D.                  | N.D.                   | N.D. | N.D. | $0.109$<br>$\pm 0.019$ | B |
| <b>Phenols</b> |      |      |                     |             |      |      |      |                        |                        |                        |      |      |      |      |             |                       |                       |                        |      |      |                        |   |
| 84             | 1956 |      | Phenol              |             | N.D. | N.D. | N.D. | $0.004$<br>$\pm 0.006$ | $0.037$<br>$\pm 0.003$ | $0.014$<br>$\pm 0.003$ | N.D. | N.D. | N.D. | N.D. | N.D.        | $0.031$<br>$\pm 0.01$ | $0.02$<br>$\pm 0.005$ | $0.025$<br>$\pm 0.025$ | N.D. | N.D. | $0.034$<br>$\pm 0.001$ | A |

<sup>1</sup> All volatile metabolites are listed by the order of their RI values; <sup>2</sup> Retention indices were determined using n-alkanes C<sub>6</sub> to C<sub>30</sub> as an external standard; <sup>3</sup> Retention indices were obtained from NIST database(<http://webbook.nist.gov/chemistry>); <sup>4</sup> Mean values of relative peak area to that of internal standard  $\pm$  standard deviation; <sup>5</sup> Not detected; <sup>6</sup> Identification of the compounds was based as follows; A, mass spectrum and retention index agree with the authentic compounds under similar conditions (positive identification); B, mass spectrum and retention index were consistent with those from NIST database; C, mass spectrum was consistent with that of W9N08 (Wiley and NIST) and manual interpretation (tentative identification); <sup>7</sup> Abbreviation are defined as shown in Table 4.

**Table S2:** Volatile metabolites of soybeans cultivated in China

| No. <sup>1</sup> | RI cal <sup>2</sup> | RI ref <sup>3</sup> | Volatile Compounds           | Relative Peak Area <sup>4</sup> |                   |                 |                 |                 |                 |                   |                  |                  |                   |                  |                  | ID <sup>6</sup>  |      |   |
|------------------|---------------------|---------------------|------------------------------|---------------------------------|-------------------|-----------------|-----------------|-----------------|-----------------|-------------------|------------------|------------------|-------------------|------------------|------------------|------------------|------|---|
|                  |                     |                     |                              | INUL <sup>7</sup>               | HEHA              | JIME            | LIDA            | HESH            | SHJI            | HUHU              | ANHU             | ZHPI             | FULO              | JIJI             | GUSH             |                  | GUBA |   |
| <b>Acids</b>     |                     |                     |                              |                                 |                   |                 |                 |                 |                 |                   |                  |                  |                   |                  |                  |                  |      |   |
| 1                | 1448                |                     | Acetic acid                  | 2.803<br>±0.023                 | N.D. <sup>5</sup> | N.D.            | N.D.            | 0.033<br>±0.014 | 0.021<br>±0.013 | N.D.              | 0.035<br>±0.012  | 2.07<br>±0.048   | 9.045<br>±3.215   | N.D.             | 7.543<br>±1.880  | 2.55<br>±0.266   | A    |   |
| 2                | 1861                | 1854                | Hexanoic acid                | N.D.                            | N.D.              | N.D.            | N.D.            | N.D.            | N.D.            | N.D.              | N.D.             | N.D.             | 1.355<br>±0.489   | N.D.             | N.D.             | N.D.             | B    |   |
| <b>Alcohols</b>  |                     |                     |                              |                                 |                   |                 |                 |                 |                 |                   |                  |                  |                   |                  |                  |                  |      |   |
| 3                | 925                 |                     | Propan-2-ol                  | N.D.                            | N.D.              | N.D.            | 0.02<br>±0.035  | N.D.            | N.D.            | N.D.              | N.D.             | N.D.             | N.D.              | N.D.             | N.D.             | N.D.             | N.D. | A |
| 4                | 930                 |                     | Ethanol                      | 4.229<br>±1.103                 | 0.86<br>±0.098    | 4.304<br>±1.362 | 0.96<br>±0.033  | 9.618<br>±3.136 | 3.465<br>±0.890 | 4.822<br>±5.155   | 25.695<br>±3.938 | 8.165<br>±0.833  | 20.333<br>±11.479 | 3.426<br>±0.827  | 4.168<br>±0.999  | 2.998<br>±0.478  | A    |   |
| 5                | 1024                |                     | Butan-2-ol                   | 0.278<br>±0.033                 | 0.148<br>±0.009   | 0.253<br>±0.151 | 0.084<br>±0.006 | 0.346<br>±0.178 | 0.162<br>±0.035 | 0.159<br>±0.189   | 0.275<br>±0.044  | 0.269<br>±0.029  | 0.755<br>±0.305   | 0.399<br>±0.104  | 0.626<br>±0.303  | 0.259<br>±0.049  | A    |   |
| 6                | 1098                |                     | 2-Methylpropan-1-ol          | 0.158<br>±0.012                 | N.D.              | N.D.            | N.D.            | N.D.            | N.D.            | N.D.              | N.D.             | 0.27<br>±0.101   | 0.598<br>±0.560   | N.D.             | N.D.             | N.D.             | A    |   |
| 7                | 1129                |                     | 1-Methoxypropan-2-ol         | 0.349<br>±0.034                 | 0.321<br>±0.027   | 0.357<br>±0.135 | 0.147<br>±0.018 | 0.611<br>±0.114 | 0.371<br>±0.036 | 0.646<br>±0.379   | 0.772<br>±0.017  | 1.612<br>±0.165  | 4.209<br>±0.863   | 2.695<br>±0.637  | 2.996<br>±0.366  | 4.071<br>±0.463  | A    |   |
| 8                | 1151                |                     | Butan-1-ol                   | 1.867<br>±0.267                 | 3.356<br>±0.095   | 4.218<br>±2.108 | 2.114<br>±0.268 | 7.326<br>±2.199 | 5.08<br>±0.928  | 16.827<br>±12.654 | 13.653<br>±0.435 | 19.744<br>±1.306 | 22.487<br>±6.99   | 14.498<br>±3.180 | 13.835<br>±3.352 | 10.915<br>±1.360 | A    |   |
| 9                | 1194                |                     | 2,5-Dimethylhexan-2-ol       | N.D.                            | N.D.              | N.D.            | 0.334<br>±0.029 | N.D.            | N.D.            | N.D.              | N.D.             | N.D.             | 0.51<br>±0.140    | N.D.             | 0.231<br>±0.013  | N.D.             | C    |   |
| 10               | 1212                |                     | 3-Methylbutan-1-ol           | 2.162<br>±0.051                 | N.D.              | N.D.            | N.D.            | N.D.            | N.D.            | N.D.              | N.D.             | 1.732<br>±0.955  | 2.792<br>±1.953   | N.D.             | N.D.             | N.D.             | A    |   |
| 11               | 1255                |                     | Pentan-1-ol                  | 0.356<br>±0.005                 | 0.159<br>±0.021   | 0.342<br>±0.066 | 0.348<br>±0.043 | 0.347<br>±0.222 | 0.348<br>±0.046 | 1.138<br>±1.256   | 0.827<br>±0.160  | 0.811<br>±0.371  | 3.591<br>±1.275   | 0.221<br>±0.030  | 0.679<br>±0.208  | 1.173<br>±0.306  | A    |   |
| 12               | 1289                | 1288                | Heptan-4-ol                  | 0.031<br>±0.011                 | 0.048<br>±0.005   | 0.062±0.02      | 0.023<br>±0.002 | 0.138<br>±0.087 | 0.103<br>±0.026 | 0.233<br>±0.156   | 0.247<br>±0.027  | 0.148<br>±0.022  | 0.245<br>±0.121   | 0.217<br>±0.052  | 0.072<br>±0.032  | 0.105<br>±0.012  | B    |   |
| 13               | 1345                |                     | 3-Methylheptan-4-ol          | N.D.                            | N.D.              | N.D.            | N.D.            | N.D.            | N.D.            | N.D.              | N.D.             | 0.147<br>±0.026  | N.D.              | N.D.             | 0.086<br>±0.071  | 0.069<br>±0.008  | A    |   |
| 14               | 1358                |                     | Hexan-1-ol                   | 1.492<br>±0.028                 | 0.969<br>±0.186   | 1.52<br>±0.492  | 3.028<br>±0.329 | 1.89<br>±1.579  | 1.532<br>±0.345 | 8.174<br>±10.29   | 4.77<br>±0.994   | 2.757<br>±0.901  | 9.973<br>±3.294   | 1.009<br>±0.116  | 0.903<br>±0.018  | 1.834<br>±0.330  | A    |   |
| 15               | 1398                |                     | Octan-3-ol                   | N.D.                            | N.D.              | N.D.            | N.D.            | N.D.            | N.D.            | N.D.              | N.D.             | 0.239<br>±0.111  | 0.571<br>±0.170   | N.D.             | N.D.             | N.D.             | A    |   |
| 16               | 1402                |                     | 2-Butoxyethanol              | 0.136<br>±0.007                 | N.D.              | N.D.            | N.D.            | 0.533<br>±0.232 | N.D.            | N.D.              | N.D.             | 0.041<br>±0.004  | N.D.              | 0.197<br>±0.053  | N.D.             | N.D.             | A    |   |
| 17               | 1428                |                     | 3-Methoxy-3-methylbutan-1-ol | N.D.                            | N.D.              | N.D.            | N.D.            | N.D.            | N.D.            | N.D.              | N.D.             | 0.234<br>±0.032  | 1.235<br>±0.450   | 7.942<br>±1.853  | 0.432<br>±0.088  | 0.303<br>±0.049  | A    |   |
| 18               | 1448                |                     | Oct-1-en-3-ol                | N.D.                            | N.D.              | N.D.            | 0.123<br>±0.035 | N.D.            | 0.104<br>±0.031 | N.D.              | 0.184<br>±0.106  | N.D.             | N.D.              | N.D.             | N.D.             | N.D.             | A    |   |
| 19               | 1454                |                     | Heptan-1-ol                  | N.D.                            | N.D.              | N.D.            | N.D.            | N.D.            | N.D.            | N.D.              | N.D.             | 0.151<br>±0.016  | N.D.              | N.D.             | N.D.             | N.D.             | A    |   |
| 20               | 1493                |                     | 2-Ethylhexan-1-ol            | 1.899<br>±0.203                 | 1.605<br>±0.608   | 1.862<br>±0.228 | 0.529<br>±0.028 | 3.59<br>±2.246  | 2.29<br>±0.443  | 4.065<br>±1.931   | 4.641<br>±0.438  | 3.341<br>±0.213  | 4.323<br>±1.250   | 3.787<br>±0.732  | 0.871<br>±0.377  | 2.303<br>±0.562  | A    |   |

|                  |      |      |                                       |                 |                 |                 |                 |                   |                 |                   |                 |                 |                  |                 |                  |                 |   |
|------------------|------|------|---------------------------------------|-----------------|-----------------|-----------------|-----------------|-------------------|-----------------|-------------------|-----------------|-----------------|------------------|-----------------|------------------|-----------------|---|
| 21               | 1565 |      | Octan-1-ol                            | N.D.            | N.D.            | 0.11<br>±0.038  | 0.205<br>±0.028 | 0.234<br>±0.124   | N.D.            | 0.339<br>±0.313   | N.D.            | N.D.            | 0.559<br>±0.163  | 0.121<br>±0.026 | N.D.             | N.D.            | A |
| 22               | 1582 | 1580 | Butane-2,3-diol                       | 0.074<br>±0.004 | N.D.            | N.D.            | N.D.            | N.D.              | N.D.            | 0.387<br>±0.306   | N.D.            | N.D.            | 0.399<br>±0.184  | N.D.            | N.D.             | N.D.            | B |
| 23               | 1594 |      | Propane-1,2-diol                      | N.D.            | N.D.            | N.D.            | N.D.            | N.D.              | N.D.            | N.D.              | N.D.            | N.D.            | N.D.             | 0.612<br>±0.267 | N.D.             | N.D.            | A |
| 24               | 1642 | 1631 | 5-Methyl-2-propan-2-ylcyclohexan-1-ol | 0.185<br>±0.006 | 0.167<br>±0.025 | N.D.            | 0.106<br>±0.012 | 0.246<br>±0.078   | N.D.            | 0.2<br>±0.115     | 0.229<br>±0.038 | 0.213<br>±0.016 | 0.418<br>±0.150  | 0.175<br>±0.018 | 0.689<br>±0.061  | 0.248<br>±0.034 | B |
| 25               | 1666 |      | Nonan-1-ol                            | N.D.            | N.D.            | N.D.            | ±0.035          | ±0.245            | N.D.            | 0.336<br>±0.443   | N.D.            | N.D.            | 0.41<br>1±0.161  | N.D.            | N.D.             | N.D.            | A |
| 26               | 1759 |      | 2-Phenylpropan-2-ol                   | N.D.            | N.D.            | N.D.            | N.D.            | 0.041<br>±0.019   | N.D.            | N.D.              | N.D.            | N.D.            | N.D.             | N.D.            | N.D.             | N.D.            | A |
| 27               | 1875 |      | Phenylmethanol                        | 0.27<br>±0.009  | N.D.            | N.D.            | N.D.            | 0.579<br>±0.248   | 0.23<br>±0.028  | 0.328<br>±0.192   | N.D.            | N.D.            | N.D.             | N.D.            | 1.737<br>±0.875  | 0.286<br>±0.025 | A |
| <b>Aldehydes</b> |      |      |                                       |                 |                 |                 |                 |                   |                 |                   |                 |                 |                  |                 |                  |                 |   |
| 28               | 605  |      | Acetaldehyde                          | N.D.            | N.D.            | 0.181<br>±0.084 | N.D.            | 0.189<br>±0.061   | 0.09<br>±0.023  | 0.229<br>±0.191   | 0.495<br>±0.043 | 0.161<br>±0.059 | N.D.             | 0.097<br>±0.048 | N.D.             | 0.054<br>±0.016 | A |
| 29               | 857  |      | Butanal                               | N.D.            | 0.016<br>±0.002 | N.D.            | N.D.            | N.D.              | N.D.            | 0.639<br>±0.824   | 0.091<br>±0.006 | 0.143<br>±0.054 | N.D.             | 0.114<br>±0.037 | N.D.             | 0.019<br>±0.005 | A |
| 30               | 863  |      | 2-Methylprop-2-enal                   | N.D.            | 0.011<br>±0.006 | N.D.            | N.D.            | N.D.              | N.D.            | N.D.              | N.D.            | N.D.            | N.D.             | N.D.            | N.D.             | 0.026<br>±0.000 | A |
| 31               | 1074 |      | Hexanal                               | 0.406<br>±0.012 | 1.889<br>±0.312 | 2.878<br>±0.389 | 2.468<br>±0.076 | 2.456<br>±0.340   | 2.43<br>±0.636  | 5.467<br>±2.274   | 6.196<br>±1.010 | 0.767<br>±0.121 | 10.439<br>±3.156 | 1.429<br>±0.245 | 1.721<br>±0.489  | 5.322<br>±2.829 | A |
| 32               | 1181 |      | Heptanal                              | N.D.            | 0.337<br>±0.048 | 0.3<br>±0.032   | 0.291<br>±0.019 | 0.739<br>±0.127   | 0.353<br>±0.047 | 0.65<br>±0.306    | 0.598<br>±0.074 | N.D.            | 1.021<br>±0.330  | 0.417<br>±0.094 | N.D.             | 0.331<br>±0.025 | A |
| 33               | 1210 |      | (E)-Hex-2-enal                        | N.D.            | 0.511<br>±0.103 | 0.4<br>±0.131   | N.D.            | 0.409<br>±0.186   | 0.37<br>±0.049  | 1.27<br>±0.901    | 0.895<br>±0.202 | N.D.            | N.D.             | N.D.            | N.D.             | 0.515<br>±0.125 | A |
| 34               | 1285 | 1287 | Octanal                               | 0.15<br>±0.015  | 0.472<br>±0.070 | 0.349<br>±0.065 | 0.426<br>±0.045 | 0.861<br>±0.088   | 0.372<br>±0.100 | 0.614<br>±0.190   | 0.485<br>±0.070 | 0.093<br>±0.002 | 1.032<br>±0.154  | 0.662<br>±0.134 | 0.223<br>±0.063  | 0.397<br>±0.060 | B |
| 35               | 1317 |      | (E)-Hept-2-enal                       | N.D.            | N.D.            | 0.069<br>±0.033 | N.D.            | 0.076<br>±0.015   | 0.04<br>±0.015  | 0.133<br>±0.112   | 0.1<br>±0.020   | N.D.            | N.D.             | N.D.            | N.D.             | N.D.            | A |
| 36               | 1391 |      | Nonanal                               | 0.571<br>±0.074 | 2.673<br>±0.323 | 2.068<br>±0.325 | 3.235<br>±0.193 | 6.729<br>±0.874   | 2.079<br>±0.734 | 3.405<br>±0.612   | 2.15<br>±0.244  | 0.86<br>±0.124  | 3.724<br>±0.958  | 3.92<br>±0.625  | 0.709<br>±0.183  | 2.361<br>±0.137 | A |
| 37               | 1420 |      | (E)-Oct-2-enal                        | N.D.            | N.D.            | 0.145<br>±0.064 | N.D.            | 0.164<br>±0.065   | N.D.            | 0.317<br>±0.265   | N.D.            | N.D.            | N.D.             | N.D.            | N.D.             | N.D.            | A |
| 38               | 1495 |      | Decanal                               | N.D.            | N.D.            | N.D.            | 0.212<br>±0.019 | N.D.              | N.D.            | N.D.              | N.D.            | N.D.            | N.D.             | N.D.            | N.D.             | N.D.            | A |
| 39               | 1514 |      | Benzaldehyde                          | 0.527<br>±0.054 | 0.369<br>±0.022 | 0.487<br>±0.038 | 0.208<br>±0.003 | 0.842<br>±0.152   | 0.402<br>±0.061 | 0.651<br>±0.125   | 0.486<br>±0.032 | 0.369<br>±0.304 | 0.685<br>±0.185  | 0.517<br>±0.072 | 17.114<br>±14.95 | 1.229<br>±0.248 | A |
| 40               | 1532 | 1542 | (E)-Non-2-enal                        | N.D.            | 0.167<br>±0.017 | N.D.            | 0.364<br>±0.023 | N.D.              | N.D.            | N.D.              | N.D.            | N.D.            | N.D.             | N.D.            | N.D.             | N.D.            | B |
| <b>Benzenes</b>  |      |      |                                       |                 |                 |                 |                 |                   |                 |                   |                 |                 |                  |                 |                  |                 |   |
| 41               | 1027 |      | Toluene                               | 17.019<br>±2.87 | 5.657<br>±0.743 | 2.736<br>±0.872 | 2.259<br>±0.017 | 10.099<br>±10.187 | 2.709<br>±1.22  | 13.237<br>±19.586 | 5.453<br>±1.022 | 5.707<br>±1.842 | N.D.             | 3.99<br>±2.072  | 7.867<br>±3.989  | 1.45<br>±0.030  | A |
| 42               | 1119 |      | Ethylbenzene                          | 0.221<br>±0.047 | 0.162<br>±0.016 | 0.156<br>±0.048 | 0.059<br>±0.005 | N.D.              | 0.145<br>±0.074 | 0.187<br>±1.239   | 0.208<br>±0.014 | 0.336<br>±0.069 | 0.325<br>±0.226  | 0.195<br>±0.196 | 0.199<br>±0.199  | N.D.            | A |
| 43               | 1126 |      | 1,4-Xylene                            | N.D.            | 0.091           | 0.064           | 0.03            | 0.129             | 0.07            | 0.265             | 0.072           | 0.053           | N.D.             | 0.256           | N.D.             | N.D.            | A |

|               |      |      |                                                    |                 |                 |                  |                 |                  |                  |                  |                  |                 |                  |                  |                 |                 |   |
|---------------|------|------|----------------------------------------------------|-----------------|-----------------|------------------|-----------------|------------------|------------------|------------------|------------------|-----------------|------------------|------------------|-----------------|-----------------|---|
| 44            | 1133 |      | 1,3-Xylene                                         | 0.358<br>±0.079 | 0.202<br>±0.022 | 0.249<br>±0.099  | 0.14<br>±0.011  | 0.569<br>±0.591  | 0.231<br>±0.138  | 0.702<br>±1.032  | 0.17<br>±0.022   | 0.232<br>±0.078 | 0.812<br>±0.523  | 0.564<br>±0.335  | 0.37<br>±0.317  | 0.077<br>±0.003 | A |
| 45            | 1250 |      | Styrene                                            | N.D.            | N.D.            | ±0.106<br>±0.017 | N.D.            | ±0.246<br>±0.177 | ±0.122<br>±0.031 | 0.283<br>±0.262  | 0.099<br>±0.05   | N.D.            | ±0.334<br>±0.296 | ±0.758<br>±0.143 | 0.571<br>±0.219 | ±0.077<br>±0.02 | A |
| 46            | 1264 |      | 1-Methyl-3-propan-2-ylbenzene                      | 0.016<br>±0.004 | N.D.            | N.D.             | N.D.            | 0.192<br>±0.212  | 0.047<br>±0.030  | 0.145<br>±0.181  | 0.059<br>±0.014  | 0.219<br>±0.126 | 0.657<br>±0.403  | 0.074<br>±0.046  | 0.241<br>±0.239 | 0.046<br>±0.015 | A |
| 47            | 1273 |      | 1,2,3-Trimethylbenzene                             | 0.033<br>±0.009 | 0.034<br>±0.011 | 0.039<br>±0.017  | 0.02<br>±0.008  | 0.186<br>±0.177  | 0.055<br>±0.028  | 0.145<br>±0.180  | 0.058<br>±0.010  | 0.046<br>±0.015 | 0.272<br>±0.219  | 0.109<br>±0.057  | 0.109<br>±0.129 | N.D.            | A |
| 48            | 1820 | 1817 | 1-Methoxy-4-[(E)-prop-1-enyl]benzene               | N.D.            | N.D.            | N.D.             | N.D.            | N.D.             | N.D.             | N.D.             | N.D.             | N.D.            | N.D.             | 0.152<br>±0.028  | N.D.            | N.D.            | B |
| <b>Esters</b> |      |      |                                                    |                 |                 |                  |                 |                  |                  |                  |                  |                 |                  |                  |                 |                 |   |
| 49            | 810  |      | Methyl acetate                                     | N.D.            | N.D.            | N.D.             | N.D.            | N.D.             | N.D.             | N.D.             | N.D.             | N.D.            | 0.611<br>±0.225  | 0.179<br>±0.044  | 0.408<br>±0.103 | 0.23<br>±0.031  | A |
| 50            | 873  |      | Ethyl acetate                                      | 0.481<br>±0.044 | N.D.            | 0.114<br>±0.048  | N.D.            | 0.28<br>±0.221   | N.D.             | N.D.             | 0.421<br>±0.076  | 0.401<br>±0.111 | 1.775<br>±1.085  | 0.496<br>±0.220  | 0.796<br>±0.386 | 0.273<br>±0.092 | A |
| 51            | 947  |      | Ethyl propanoate                                   | N.D.            | N.D.            | N.D.             | N.D.            | N.D.             | N.D.             | N.D.             | 0.031<br>±0.003  | N.D.            | N.D.             | N.D.             | N.D.            | N.D.            | A |
| 52            | 1067 |      | Butyl acetate                                      | 4.851<br>±1.253 | 0.373<br>±0.035 | 2.314<br>±0.372  | 0.438<br>±0.103 | 6.813<br>±6.189  | 1.439<br>±0.818  | 6.744<br>±8.587  | 2.022<br>±0.543  | 0.475<br>±0.047 | 5.451<br>±3.763  | 5.333<br>±2.749  | 4.264<br>±1.760 | 2.507<br>±0.340 | A |
| 53            | 1141 |      | Butyl propanoate                                   | 1.965<br>±0.636 | 0.931<br>±0.035 | 2.016<br>±0.229  | 0.545<br>±0.103 | 4.842<br>±4.519  | 1.73<br>±0.902   | 6.1<br>±7.201    | 3.112<br>±0.451  | 0.36<br>±0.141  | 4.284<br>±2.817  | 3.599<br>1.821   | 1.438<br>±1.303 | 1.306<br>±0.155 | A |
| 54            | 1175 |      | Butyl prop-2-enoate                                | 1.139<br>±0.325 | 1.022<br>±0.080 | 1.127<br>±0.189  | 0.467<br>±0.054 | 2.585<br>±2.434  | 1.182<br>±0.461  | 3.213<br>±3.434  | 1.832<br>±0.225  | 0.516<br>±0.078 | 3.469<br>±2.101  | 1.91<br>±0.887   | 1.35<br>±1.185  | 0.661<br>±0.05  | A |
| 55            | 1217 |      | Butyl butanoate                                    | 3.191<br>±1.332 | 3.425<br>±0.271 | 4.822<br>±0.995  | 1.452<br>±0.208 | 10.555<br>±8.953 | 5.871<br>±3.489  | 13.69<br>±12.426 | 12.291<br>±1.299 | 1.681<br>±0.327 | 15.808<br>±9.685 | 8.919<br>±4.203  | 3.205<br>±3.700 | 3.145<br>±0.311 | A |
| 56            | 1234 |      | Ethyl hexanoate                                    | N.D.            | N.D.            | 0.059<br>±0.053  | N.D.            | 0.283<br>±0.125  | 0.052<br>±0.017  | 0.083<br>±0.040  | 0.159<br>±0.021  | N.D.            | 0.359<br>±0.150  | N.D.             | N.D.            | 0.082<br>±0.018 | A |
| 57            | 1384 |      | 2-Ethylhexyl acetate                               | N.D.            | N.D.            | N.D.             | N.D.            | N.D.             | N.D.             | 0.124<br>±0.099  | N.D.             | N.D.            | N.D.             | N.D.             | N.D.            | N.D.            | A |
| 58            | 1479 |      | 2-Ethylhexyl prop-2-enoate                         | 0.111<br>±0.119 | 0.195<br>±0.062 | N.D.             | N.D.            | N.D.             | N.D.             | 0.405<br>±0.162  | 1.095<br>±0.309  | N.D.            | N.D.             | N.D.             | N.D.            | N.D.            | A |
| 59            | 1664 | 1672 | Triethyl phosphate                                 | N.D.            | N.D.            | N.D.             | N.D.            | N.D.             | N.D.             | N.D.             | 1.992<br>±1.250  | N.D.            | N.D.             | N.D.             | N.D.            | N.D.            | B |
| 60            | 1765 |      | Methyl 2-hydroxybenzoate                           | N.D.            | N.D.            | N.D.             | N.D.            | N.D.             | N.D.             | N.D.             | 0.486<br>±0.068  | N.D.            | N.D.             | N.D.             | 0.39<br>±0.131  | N.D.            | A |
| 61            | 1850 |      | 3-Hydroxy-2,4,4-trimethylpentyl 2-methylpropanoate | 0.06<br>±0.004  | 0.399<br>±0.245 | 0.218<br>±0.202  | 0.235<br>±0.099 | N.D.             | N.D.             | N.D.             | N.D.             | N.D.            | N.D.             | N.D.             | 0.446<br>±0.153 | N.D.            | C |
| <b>Furans</b> |      |      |                                                    |                 |                 |                  |                 |                  |                  |                  |                  |                 |                  |                  |                 |                 |   |
| 62            | 863  | 851  | 3-Methylfuran                                      | N.D.            | N.D.            | N.D.             | 0.035<br>±0.014 | 0.01<br>±0.001   | N.D.             | N.D.             | 0.033<br>±0.010  | 0.019<br>±0.003 | 0.183<br>±0.069  | 0.021<br>±0.003  | N.D.            | 0.013<br>±0.002 | B |
| 63            | 873  |      | 2-Methylfuran                                      | 0.039<br>±0.004 | 0.009<br>±0.005 | 0.013<br>±0.004  | 0.004<br>±0.001 | N.D.             | 0.018<br>±0.002  | 0.05<br>±0.064   | 0.02<br>±0.007   | 0.02<br>±0.004  | 0.055<br>±0.021  | 0.018<br>±0.008  | N.D.            | 0.076<br>±0.001 | A |
| 64            | 941  |      | 2-Ethylfuran                                       | 0.088<br>±0.014 | 0.116<br>±0.034 | 0.142<br>±0.040  | 0.181<br>±0.015 | 0.064<br>±0.014  | 0.154<br>±0.047  | 0.793<br>±1.026  | 0.38<br>±0.084   | 0.113<br>±0.041 | 0.742<br>±0.306  | 0.113<br>±0.024  | 0.213<br>±0.099 | 0.2<br>±0.033   | A |
| 65            | 1230 |      | 2-Pentylfuran                                      | 0.057           | 0.104           | 0.314            | 0.074           | 0.369            | 0.334            | 0.745            | 0.357            | N.D.            | 0.57             | 0.079            | 0.139           | 0.155           | A |

|                               |      |      | ±0.004          | ±0.019          | ±0.140          | ±0.015          | ±0.139          | ±0.015          | ±0.534          | ±0.103          |                  | ±0.163          | ±0.011          | ±0.008          | ±0.057          |   |
|-------------------------------|------|------|-----------------|-----------------|-----------------|-----------------|-----------------|-----------------|-----------------|-----------------|------------------|-----------------|-----------------|-----------------|-----------------|---|
| <b>Ketones</b>                |      |      |                 |                 |                 |                 |                 |                 |                 |                 |                  |                 |                 |                 |                 |   |
| 66                            | 805  |      | 3.145<br>±0.203 | N.D.            | 1.938<br>±0.338 | 1.551<br>±0.035 | 1.318<br>±0.910 | 0.939<br>±0.292 | 6.598<br>±8.154 | 3.108<br>±0.657 | 2.176<br>±0.256  | 5.92<br>±2.770  | 1.356<br>±0.203 | 3.481<br>±0.914 | 6.734<br>±1.240 | A |
| 67                            | 890  |      | 0.35<br>±0.032  | 0.221<br>±0.046 | 0.379<br>±0.043 | 0.428<br>±0.043 | 0.242<br>±0.116 | 0.328<br>±0.071 | 1.181<br>±1.375 | 0.733<br>±0.154 | 1.005<br>±0.177  | 0.908<br>±0.39  | 0.451<br>±0.072 | 0.692<br>±0.302 | 0.848<br>±0.127 | A |
| 68                            | 944  |      | N.D.            | N.D.            | N.D.            | N.D.            | N.D.            | N.D.            | N.D.            | N.D.            | 0.018<br>±0.0180 | N.D.            | N.D.            | N.D.            | N.D.            | C |
| 69                            | 966  |      | 0.081<br>±0.011 | N.D.            | 0.038<br>±0.006 | 0.155<br>±0.021 | 0.03<br>±0.017  | 0.057<br>±0.015 | N.D.            | N.D.            | 0.834<br>±0.376  | 2.211<br>±0.911 | 0.034<br>±0.014 | 0.141<br>±0.026 | 0.84<br>±0.133  | A |
| 70                            | 1097 |      | N.D.            | N.D.            | N.D.            | N.D.            | N.D.            | N.D.            | N.D.            | N.D.            | N.D.             | N.D.            | N.D.            | N.D.            | 0.28<br>±0.046  | A |
| 71                            | 1121 | 1121 | N.D.            | N.D.            | N.D.            | N.D.            | 1.221<br>±0.294 | N.D.            | N.D.            | N.D.            | N.D.             | 1.591<br>±0.524 | N.D.            | N.D.            | 2.298<br>±0.303 | B |
| 72                            | 1122 |      | N.D.            | 0.167<br>±0.028 | 0.148<br>±0.003 | N.D.            | N.D.            | 0.194<br>±0.048 | 0.473<br>±0.387 | 0.419<br>±0.046 | 0.33<br>±0.004   | N.D.            | 0.291<br>±0.081 | N.D.            | N.D.            | A |
| 73                            | 1145 |      | 0.187<br>±0.077 | 0.499<br>±0.032 | 0.411<br>±0.052 | 0.177<br>±0.020 | 0.909<br>±0.850 | 0.596<br>±0.239 | 1.855<br>±2.112 | 1.119<br>±0.115 | 0.789<br>±0.234  | 2.281<br>±1.624 | 0.962<br>±0.515 | 1.074<br>±1.047 | 0.254<br>±0.024 | C |
| 74                            | 1171 |      | N.D.            | N.D.            | N.D.            | N.D.            | N.D.            | N.D.            | 1.98<br>±3.064  | N.D.            | N.D.             | N.D.            | N.D.            | N.D.            | N.D.            | A |
| 75                            | 1178 |      | N.D.            | N.D.            | 0.049<br>±0.005 | 0.065<br>±0.004 | 0.025<br>±0.019 | 0.063<br>±0.008 | 0.17<br>±0.155  | 0.107<br>±0.020 | 0.091<br>±0.019  | 0.348<br>±0.136 | N.D.            | 0.06<br>±0.007  | 0.118<br>±0.065 | A |
| 76                            | 1252 |      | N.D.            | N.D.            | N.D.            | N.D.            | N.D.            | N.D.            | N.D.            | N.D.            | 0.246<br>±0.108  | N.D.            | N.D.            | N.D.            | N.D.            | A |
| 77                            | 1279 |      | N.D.            | N.D.            | N.D.            | N.D.            | N.D.            | N.D.            | 0.182<br>±0.136 | N.D.            | 0.074<br>±0.027  | 0.182<br>±0.073 | N.D.            | N.D.            | 0.122<br>±0.034 | A |
| 78                            | 1282 |      | N.D.            | N.D.            | N.D.            | 0.088<br>±0.010 | N.D.            | N.D.            | N.D.            | N.D.            | 0.068<br>±0.026  | N.D.            | N.D.            | N.D.            | N.D.            | A |
| 79                            | 1335 |      | 0.099<br>±0.019 | 0.097<br>±0.014 | 0.153<br>±0.098 | 0.086<br>±0.010 | 0.271<br>±0.040 | 0.092<br>±0.013 | N.D.            | 0.106<br>±0.017 | 0.086<br>±0.006  | N.D.            | 0.085<br>±0.01  | 0.063<br>±0.03  | 0.1<br>±0.032   | A |
| 80                            | 1402 | 1414 | N.D.            | N.D.            | N.D.            | N.D.            | N.D.            | N.D.            | N.D.            | N.D.            | N.D.             | 0.531<br>±0.219 | N.D.            | N.D.            | 0.184<br>±0.03  | B |
| 81                            | 1489 | 1495 | N.D.            | N.D.            | N.D.            | N.D.            | N.D.            | 0.162<br>±0.040 | N.D.            | N.D.            | N.D.             | N.D.            | N.D.            | N.D.            | N.D.            | B |
| 82                            | 1584 |      | N.D.            | N.D.            | N.D.            | N.D.            | N.D.            | N.D.            | N.D.            | N.D.            | N.D.             | 0.171<br>±0.114 | N.D.            | N.D.            | N.D.            | A |
| <b>Lactones</b>               |      |      |                 |                 |                 |                 |                 |                 |                 |                 |                  |                 |                 |                 |                 |   |
| 83                            | 1596 |      | N.D.            | N.D.            | N.D.            | N.D.            | N.D.            | N.D.            | N.D.            | N.D.            | 0.21<br>±0.007   | 0.255<br>±0.103 | N.D.            | 0.109<br>±0.018 | N.D.            | A |
| 84                            | 1613 |      | 0.455<br>±0.006 | N.D.            | 0.163<br>±0.023 | 0.154<br>±0.029 | 0.228<br>±0.092 | N.D.            | 0.642<br>±0.838 | 0.266<br>±0.013 | 0.687<br>±0.219  | 1.375<br>±0.670 | 0.343<br>±0.066 | 0.258<br>±0.014 | 0.221<br>±0.022 | A |
| 85                            | 1688 | 1694 | 0.115<br>±0.002 | 0.146<br>±0.002 | 0.244<br>±0.029 | 0.151<br>±0.019 | 0.149<br>±0.078 | 0.152<br>±0.013 | 0.585<br>±0.458 | 0.339<br>±0.043 | 0.162<br>±0.021  | 0.352<br>±0.165 | N.D.            | 0.14<br>±0.015  | 0.169<br>±0.032 | B |
| 86                            | 1991 | 2005 | N.D.            | N.D.            | N.D.            | N.D.            | N.D.            | N.D.            | N.D.            | N.D.            | N.D.             | 0.183<br>±0.081 | N.D.            | N.D.            | N.D.            | B |
| <b>N-containing compounds</b> |      |      |                 |                 |                 |                 |                 |                 |                 |                 |                  |                 |                 |                 |                 |   |

|                               |      |      |                                            |                 |                 |                 |                 |                 |                 |                 |                 |                 |                 |                 |                 |                 |   |
|-------------------------------|------|------|--------------------------------------------|-----------------|-----------------|-----------------|-----------------|-----------------|-----------------|-----------------|-----------------|-----------------|-----------------|-----------------|-----------------|-----------------|---|
| 87                            | <600 |      | N,N-Dimethylmethanamine                    | 0.065<br>±0.045 | 0.056<br>±0.018 | N.D.            | 0.064<br>±0.012 | 0.032<br>±0.011 | N.D.            | N.D.            | 0.061<br>±0.015 | N.D.            | 0.244<br>±0.228 | 0.081<br>±0.039 | 0.05<br>±0.038  | 0.012<br>±0.004 | A |
| 88                            | 995  |      | Acetonitrile                               | N.D.            | N.D.            | N.D.            | N.D.            | N.D.            | N.D.            | N.D.            | 1.392<br>±0.102 | 3.495<br>±1.868 | 2.29<br>±0.640  | 3.031<br>±1.475 | 2.048<br>±0.675 | A               |   |
| 89                            | 1725 |      | Naphthalene                                | N.D.            | 0.097<br>±0.004 | 0.084<br>±0.038 | N.D.            | 0.197<br>±0.108 | 0.068<br>±0.025 | N.D.            | N.D.            | N.D.            | N.D.            | N.D.            | N.D.            | A               |   |
| <b>S-containing compounds</b> |      |      |                                            |                 |                 |                 |                 |                 |                 |                 |                 |                 |                 |                 |                 |                 |   |
| 90                            | <800 |      | Methylsulfanylmethane                      | 0.258<br>±0.192 | 0.176<br>±0.057 | 0.116<br>±0.056 | 0.092<br>±0.015 | 0.083<br>±0.035 | 0.137<br>±0.032 | 0.276<br>±0.336 | 0.191<br>±0.049 | 0.176<br>±0.004 | 0.905<br>±0.628 | 0.044<br>±0.006 | 0.081<br>±0.006 | 0.291<br>±0.100 | A |
| 91                            | 1937 |      | 1,3-Benzothiazole                          | 0.29<br>±0.135  | 0.611<br>±0.09  | 0.182<br>±0.034 | 0.359<br>±0.327 | 0.599<br>±0.267 | 0.348<br>±0.084 | 0.395<br>±0.120 | 0.202<br>±0.059 | 0.277<br>±0.115 | 0.571<br>±0.770 | 0.28<br>±0.080  | 0.285<br>±0.013 | 0.276<br>±0.030 | A |
| <b>Hydrocarbons</b>           |      |      |                                            |                 |                 |                 |                 |                 |                 |                 |                 |                 |                 |                 |                 |                 |   |
| 92                            | <600 |      | 2-Methylprop-1-ene                         | N.D.            | 0.043<br>±0.003 | 0.047<br>±0.011 | 0.04<br>±0.003  | 0.076<br>±0.026 | 0.01<br>5±0.006 | 0.059<br>±0.025 | 0.033<br>±0.009 | 0.033<br>±0.005 | 0.029<br>±0.004 | 0.026<br>±0.006 | 0.021<br>±0.003 | 0.019<br>±0.006 | C |
| 93                            | <600 |      | Pentane                                    | N.D.            | N.D.            | 0.003<br>±0.003 | N.D.            | N.D.            | N.D.            | 0.023<br>±0.006 | N.D.            | 0.046<br>±0.006 | 0.052<br>±0.052 | N.D.            | N.D.            | N.D.            | A |
| 94                            | 600  |      | Hexane                                     | N.D.            | 0.064<br>±0.005 | 0.051<br>±0.012 | 0.038<br>±0.006 | 0.037<br>±0.019 | 0.028<br>±0.008 | 0.097<br>±0.129 | 0.08<br>±0.036  | 0.115<br>±0.023 | 0.205<br>±0.075 | 0.115<br>±0.041 | 0.139<br>±0.056 | 0.082<br>±0.039 | A |
| 95                            | 700  |      | Heptane                                    | 0.039<br>±0.004 | N.D.            | 0.053<br>±0.037 | 0.032<br>±0.002 | 0.057<br>±0.036 | 0.05<br>±0.024  | 0.139<br>±0.201 | 0.044<br>±0.004 | 0.057<br>±0.013 | 0.386<br>±0.165 | 0.046<br>±0.014 | 0.081<br>±0.024 | 0.046<br>±0.004 | A |
| 96                            | 763  |      | 2-tert-Butylperoxy-2-methylpropane         | 0.267<br>±0.100 | 0.088<br>±0.046 | 0.151<br>±0.07  | 0.063<br>±0.041 | 1.31<br>±1.858  | N.D.            | 2.404<br>±4.060 | 0.143<br>±0.069 | 0.787<br>±0.464 | 2.789<br>±1.511 | 0.566<br>±0.557 | 1.554<br>±0.925 | 0.114<br>±0.016 | C |
| 97                            | 800  |      | Octane                                     | 0.17<br>±0.050  | N.D.            | 0.056<br>±0.017 | 0.075<br>±0.012 | N.D.            | N.D.            | N.D.            | 0.083<br>±0.011 | N.D.            | N.D.            | 0.102<br>±0.024 | 0.428<br>±0.103 | 0.086<br>±0.009 | A |
| 98                            | 875  |      | Ethylcyclohexane                           | N.D.            | N.D.            | N.D.            | N.D.            | N.D.            | 0.516<br>±0.354 | N.D.            | N.D.            | N.D.            | N.D.            | N.D.            | N.D.            | N.D.            | C |
| 99                            | 959  | 968  | 1-Butoxybutane                             | 1.163<br>±0.527 | 0.702<br>±0.065 | 0.808<br>±0.324 | 0.259<br>±0.059 | 2.88<br>±3.553  | 0.934<br>±0.715 | 5.776<br>±9.205 | 0.035<br>±0.016 | 1.631<br>±0.812 | 6.569<br>±4.542 | 1.576<br>±1.165 | 3.233<br>±2.813 | 0.355<br>±0.024 | B |
| 100                           | 999  |      | Decane                                     | 0.121<br>±0.020 | N.D.            | N.D.            | 0.026<br>±0.010 | 0.139<br>±0.176 | 0.241<br>±0.229 | N.D.            | N.D.            | N.D.            | N.D.            | N.D.            | 0.47<br>±0.429  | N.D.            | A |
| 101                           | 1093 | 1100 | Undecane                                   | N.D.            | N.D.            | N.D.            | N.D.            | N.D.            | N.D.            | 1.506<br>±2.508 | N.D.            | N.D.            | N.D.            | N.D.            | N.D.            | N.D.            | B |
| 102                           | 1198 |      | Dodecane                                   | 0.159<br>±0.031 | 0.108<br>±0.014 | 0.171<br>±0.079 | 0.115<br>±0.009 | 0.632<br>±0.542 | 0.312<br>±0.203 | 1.131<br>±1.628 | 0.164<br>±0.038 | N.D.            | N.D.            | 0.383<br>±0.143 | 0.443<br>±0.384 | 0.179<br>±0.063 | A |
| 103                           | 1299 | 1300 | Tridecane                                  | N.D.            | N.D.            | N.D.            | N.D.            | 0.545<br>±0.3   | N.D.            | 0.22<br>±0.232  | N.D.            | N.D.            | 0.175<br>±0.086 | N.D.            | N.D.            | N.D.            | B |
| 104                           | 1399 | 1400 | Tetradecane                                | 0.089<br>±0.005 | 0.156<br>±0.016 | 0.119<br>±0.062 | 0.133<br>±0.014 | 0.162<br>±0.067 | 0.15<br>±0.025  | 0.159<br>±0.091 | N.D.            | N.D.            | N.D.            | 0.209<br>±0.057 | N.D.            | 0.062<br>±0.015 | B |
| 105                           | 1456 |      | 1-Chloro-2-(1-chloropropan-2-yloxy)propane | N.D.            | N.D.            | N.D.            | N.D.            | N.D.            | N.D.            | 7.688<br>±9.274 | N.D.            | N.D.            | N.D.            | N.D.            | N.D.            | N.D.            | C |
| 106                           | 1460 |      | 1-Chloro-3-(3-chloropropoxy)propane        | N.D.            | N.D.            | N.D.            | N.D.            | N.D.            | N.D.            | 6.413<br>±8.046 | N.D.            | N.D.            | N.D.            | N.D.            | N.D.            | N.D.            | C |
| 107                           | 1466 |      | 2-Chloro-2-(2-chloropropan-2-yloxy)propane | N.D.            | N.D.            | N.D.            | N.D.            | N.D.            | N.D.            | 7.518<br>±8.897 | N.D.            | N.D.            | N.D.            | N.D.            | N.D.            | N.D.            | C |
| <b>Terpenes</b>               |      |      |                                            |                 |                 |                 |                 |                 |                 |                 |                 |                 |                 |                 |                 |                 |   |
| 108                           | 1013 |      | α-Pinene                                   | N.D.            | N.D.            | N.D.            | N.D.            | N.D.            | N.D.            | N.D.            | N.D.            | N.D.            | 0.201           | N.D.            | 0.29            | N.D.            | A |

|                  |      |      |                       |                      |                      |                      |                      |                      |                      |                      |                      |                      |                      |                      |                      |                      |   |
|------------------|------|------|-----------------------|----------------------|----------------------|----------------------|----------------------|----------------------|----------------------|----------------------|----------------------|----------------------|----------------------|----------------------|----------------------|----------------------|---|
| 109              | 1018 | 1019 | $\alpha$ -Thujene     | N.D.                 | N.D.                 | N.D.                 | 0.026<br>$\pm 0.005$ | N.D.                 | N.D.                 | N.D.                 | N.D.                 | 0.512<br>$\pm 0.570$ | 1.1<br>$\pm 0.857$   | N.D.                 | 0.191<br>$\pm 0.169$ | N.D.                 | B |
| 110              | 1112 |      | Sabinene              | N.D.                 | N.D.                 | N.D.                 | 0.016<br>$\pm 0.003$ | N.D.                 | N.D.                 | N.D.                 | N.D.                 | 0.576<br>$\pm 0.656$ | 1.429<br>$\pm 1.261$ | N.D.                 | 0.245<br>$\pm 0.262$ | N.D.                 | A |
| 111              | 1157 |      | 1-Phellandrene        | N.D.                 | N.D.                 | N.D.                 | N.D.                 | N.D.                 | N.D.                 | N.D.                 | N.D.                 | 0.041<br>$\pm 0.002$ | 0.123<br>$\pm 0.05$  | N.D.                 | N.D.                 | N.D.                 | A |
| 112              | 1162 |      | Myrcene               | N.D.                 | N.D.                 | N.D.                 | N.D.                 | 0.415<br>$\pm 0.485$ | 0.114<br>$\pm 0.093$ | 0.447<br>$\pm 0.646$ | 0.067<br>$\pm 0.021$ | 0.077<br>$\pm 0.023$ | 0.518<br>$\pm 0.423$ | 0.152<br>$\pm 0.106$ | 0.642<br>$\pm 0.752$ | 0.073<br>$\pm 0.028$ | A |
| 113              | 1172 |      | $\alpha$ -Terpinene   | N.D.                 | N.D.                 | N.D.                 | N.D.                 | N.D.                 | N.D.                 | N.D.                 | N.D.                 | 0.187<br>$\pm 0.108$ | 0.642<br>$\pm 0.455$ | N.D.                 | 0.091<br>$\pm 0.079$ | N.D.                 | A |
| 114              | 1190 |      | Limonene              | 0.212<br>$\pm 0.042$ | 0.139<br>$\pm 0.026$ | 0.31<br>$\pm 0.096$  | 0.095<br>$\pm 0.018$ | 1.967<br>$\pm 2.177$ | 0.464<br>$\pm 0.371$ | 1.7<br>$\pm 2.451$   | 0.471<br>$\pm 0.11$  | 0.675<br>$\pm 0.193$ | 3.23<br>$\pm 2.326$  | 0.783<br>$\pm 0.520$ | 2.149<br>$\pm 2.310$ | 0.319<br>$\pm 0.124$ | A |
| 115              | 1198 | 1196 | $\beta$ -Phellandrene | N.D.                 | N.D.                 | N.D.                 | N.D.                 | N.D.                 | N.D.                 | N.D.                 | N.D.                 | 0.205<br>$\pm 0.035$ | 0.594<br>$\pm 0.250$ | N.D.                 | N.D.                 | N.D.                 | B |
| 116              | 1240 |      | $\gamma$ -Terpinene   | N.D.                 | N.D.                 | N.D.                 | N.D.                 | 0.138<br>$\pm 0.130$ | 0.04<br>$\pm 0.029$  | N.D.                 | N.D.                 | 0.316<br>$\pm 0.200$ | 1.131<br>$\pm 0.792$ | 0.041<br>$\pm 0.027$ | 0.252<br>$\pm 0.247$ | 0.031<br>$\pm 0.014$ | A |
| 117              | 1277 |      | Terpinolene           | N.D.                 | N.D.                 | N.D.                 | N.D.                 | N.D.                 | N.D.                 | N.D.                 | N.D.                 | 0.065<br>$\pm 0.031$ | 0.24<br>$\pm 0.169$  | N.D.                 | N.D.                 | N.D.                 | A |
| 118              | 1559 |      | $\alpha$ -Cedrene     | N.D.                 | N.D.                 | N.D.                 | N.D.                 | N.D.                 | N.D.                 | N.D.                 | N.D.                 | N.D.                 | N.D.                 | N.D.                 | 0.889<br>$\pm 0.881$ | N.D.                 | A |
| <b>Phenols</b>   |      |      |                       |                      |                      |                      |                      |                      |                      |                      |                      |                      |                      |                      |                      |                      |   |
| 119              | 1956 |      | Phenol                | 0.028<br>$\pm 0.004$ | N.D.                 | 0.028<br>$\pm 0.003$ | N.D.                 | 0.377<br>$\pm 0.157$ | N.D.                 | N.D.                 | N.D.                 | N.D.                 | 0.126<br>$\pm 0.044$ | 0.082<br>$\pm 0.017$ | N.D.                 | N.D.                 | A |
| 120              | 2054 |      | 4-Methylphenol        | N.D.                 | N.D.                 | N.D.                 | N.D.                 | 0.046<br>$\pm 0.019$ | N.D.                 | N.D.                 | N.D.                 | N.D.                 | 0.128<br>$\pm 0.064$ | N.D.                 | N.D.                 | N.D.                 | A |
| 121              | 2059 |      | 3-Methylphenol        | N.D.                 | N.D.                 | N.D.                 | N.D.                 | 0.096<br>$\pm 0.037$ | N.D.                 | N.D.                 | N.D.                 | N.D.                 | N.D.                 | N.D.                 | N.D.                 | N.D.                 | A |
| <b>Pyrazines</b> |      |      |                       |                      |                      |                      |                      |                      |                      |                      |                      |                      |                      |                      |                      |                      |   |
| 122              | 1261 | 1263 | 2-Methylpyrazine      | 0.096<br>$\pm 0.001$ | N.D.                 | N.D.                 | N.D.                 | N.D.                 | N.D.                 | N.D.                 | N.D.                 | N.D.                 | N.D.                 | N.D.                 | N.D.                 | N.D.                 | B |
| 123              | 1317 |      | 2,5-Dimethylpyrazine  | 0.066<br>$\pm 0.003$ | N.D.                 | N.D.                 | N.D.                 | N.D.                 | N.D.                 | N.D.                 | N.D.                 | N.D.                 | N.D.                 | N.D.                 | N.D.                 | N.D.                 | A |
| 124              | 1324 |      | 2,6-Dimethylpyrazine  | 0.07<br>$\pm 0.006$  | N.D.                 | N.D.                 | N.D.                 | N.D.                 | N.D.                 | N.D.                 | N.D.                 | N.D.                 | N.D.                 | N.D.                 | N.D.                 | N.D.                 | A |

<sup>1</sup> All volatile metabolites are listed by the order of their RI values; <sup>2</sup> Retention indices were determined using n-alkanes C<sub>6</sub> to C<sub>30</sub> as an external standard; <sup>3</sup> Retention indices were obtained from NIST database(<http://webbook.nist.gov/chemistry>); <sup>4</sup> Mean values of relative peak area to that of internal standard  $\pm$  standard deviation; <sup>5</sup> Not detected; <sup>6</sup> Identification of the compounds was based as follows; A, mass spectrum and retention index agree with the authentic compounds under similar conditions (positive identification); B, mass spectrum and retention index were consistent with those from NIST database; C, mass spectrum was consistent with that of W9N08 (Wiley and NIST) and manual interpretation (tentative identification); <sup>7</sup> Abbreviation are defined as shown in Table 4.

**Table S3:** Volatile metabolites of soybeans cultivated in North America

| No. <sup>1</sup> | RI cal <sup>2</sup> | RI ref <sup>3</sup> | Volatile Compounds                                    | Relative Peak Area <sup>4</sup> |                   |             |             |             |             | ID <sup>6</sup> |
|------------------|---------------------|---------------------|-------------------------------------------------------|---------------------------------|-------------------|-------------|-------------|-------------|-------------|-----------------|
|                  |                     |                     |                                                       | IL <sup>7</sup>                 | IN                | MI          | MN          | ON          | QB          |                 |
| <b>Acids</b>     |                     |                     |                                                       |                                 |                   |             |             |             |             |                 |
| 1                | 1445                |                     | Acetic acid                                           | 2.637±0.079                     | N.D. <sup>5</sup> | N.D.        | 2.389±0.695 | 5.617±1.504 | N.D.        | A               |
| <b>Alcohols</b>  |                     |                     |                                                       |                                 |                   |             |             |             |             |                 |
| 2                | 928                 |                     | Ethanol                                               | 6.584±0.519                     | N.D.              | N.D.        | 3.026±1.061 | N.D.        | N.D.        | A               |
| 3                | 1022                |                     | Butan-2-ol                                            | 0.799±0.045                     | 0.281±0.017       | 0.481±0.072 | 0.371±0.082 | N.D.        | 0.364±0.080 | A               |
| 4                | 1098                |                     | 2-Methylpropan-1-ol                                   | 0.104±0.037                     | 0.369±0.054       | 0.145±0.009 | N.D.        | N.D.        | 0.106±0.024 | A               |
| 5                | 1128                |                     | 1-Methoxypropan-2-ol                                  | N.D.                            | N.D.              | 0.592±0.098 | N.D.        | N.D.        | N.D.        | A               |
| 6                | 1150                |                     | Butan-1-ol                                            | N.D.                            | N.D.              | N.D.        | 0.327±0.112 | 0.272±0.065 | N.D.        | A               |
| 7                | 1209                |                     | 2-Methylbutan-1-ol                                    | N.D.                            | 3.793±0.454       | N.D.        | N.D.        | N.D.        | N.D.        | C               |
| 8                | 1209                |                     | 3-Methylbutan-1-ol                                    | 1.674±0.525                     | N.D.              | N.D.        | N.D.        | 2.890±1.063 | N.D.        | A               |
| 9                | 1253                |                     | Pentan-1-ol                                           | 0.759±0.176                     | 0.124±0.010       | 0.175±0.063 | 0.067±0.029 | 0.571±0.168 | N.D.        | A               |
| 10               | 1355                |                     | Hexan-1-ol                                            | 2.837±0.601                     | 0.432±0.086       | 1.014±0.567 | N.D.        | 2.456±0.851 | N.D.        | A               |
| 11               | 1387                |                     | Octan-3-ol                                            | N.D.                            | 0.165±0.111       | N.D.        | N.D.        | N.D.        | N.D.        | A               |
| 12               | 1400                |                     | 2-Butoxyethanol                                       | 0.190±0.044                     | N.D.              | N.D.        | 0.082±0.023 | 0.146±0.03  | N.D.        | A               |
| 13               | 1447                |                     | Oct-1-en-3-ol                                         | 2.929±0.280                     | 7.134±0.957       | 4.160±0.65  | N.D.        | 4.168±1.256 | 2.481±0.760 | A               |
| 14               | 1492                |                     | 2-Ethylhexan-1-ol                                     | 2.938±0.233                     | 3.151±0.361       | 1.667±0.163 | 0.811±0.182 | 1.696±0.367 | 2.895±0.269 | A               |
| 15               | 1587                | 1589                | 2-(2-Methoxyethoxy)ethanol                            | 0.078±0.024                     | N.D.              | N.D.        | N.D.        | N.D.        | N.D.        | B               |
| 16               | 1828                |                     | Phenylmethanol                                        | N.D.                            | N.D.              | N.D.        | 0.168±0.085 | N.D.        | N.D.        | A               |
| 17               | 1920                |                     | 2,2,4-Trimethylpentane-1,3-diol                       | N.D.                            | 3.087±0.516       | N.D.        | N.D.        | N.D.        | N.D.        | C               |
| <b>Aldehydes</b> |                     |                     |                                                       |                                 |                   |             |             |             |             |                 |
| 18               | 1073                |                     | Hexanal                                               | 2.776±0.713                     | N.D.              | 0.932±0.164 | 0.837±0.463 | 1.566±0.509 | 0.259±0.133 | A               |
| 19               | 1180                |                     | Heptanal                                              | 0.121±0.005                     | N.D.              | N.D.        | 0.084±0.062 | N.D.        | N.D.        | A               |
| 20               | 1282                |                     | Octanal                                               | N.D.                            | N.D.              | N.D.        | 0.134±0.157 | 0.104±0.013 | N.D.        | B               |
| 21               | 1389                |                     | Nonanal                                               | 1.110±0.179                     | N.D.              | 0.523±0.036 | 1.106±0.843 | 0.721±0.270 | 0.341±0.424 | A               |
| 22               | 1513                |                     | Benzaldehyde                                          | 0.082±0.019                     | N.D.              | N.D.        | 0.094±0.014 | N.D.        | N.D.        | A               |
| <b>Benzenes</b>  |                     |                     |                                                       |                                 |                   |             |             |             |             |                 |
| 23               | 1025                |                     | Toluene                                               | N.D.                            | N.D.              | N.D.        | 0.721±0.533 | N.D.        | 1.178±0.333 | A               |
| 24               | 1118                |                     | Ethylbenzene                                          | N.D.                            | 0.079±0.012       | N.D.        | 0.04±0.024  | 0.208±0.092 | 0.092±0.001 | A               |
| 25               | 1131                |                     | 1,2-Xylene                                            | N.D.                            | 0.082±0.032       | 0.135±0.043 | 0.047±0.032 | 0.349±0.143 | 0.082±0.006 | A               |
| 26               | 1170                |                     | 1,3-Xylene                                            | 0.078±0.022                     | N.D.              | N.D.        | N.D.        | 0.239±0.085 | 0.049±0.012 | A               |
| <b>Esters</b>    |                     |                     |                                                       |                                 |                   |             |             |             |             |                 |
| 27               | 866                 |                     | Ethyl acetate                                         | N.D.                            | N.D.              | N.D.        | N.D.        | 0.039±0.015 | N.D.        | A               |
| 28               | 1140                |                     | Butyl propanoate                                      | N.D.                            | N.D.              | N.D.        | 0.083±0.048 | N.D.        | N.D.        | A               |
| 29               | 1215                |                     | Butyl butanoate                                       | N.D.                            | N.D.              | N.D.        | 0.252±0.160 | N.D.        | N.D.        | A               |
| 30               | 1850                |                     | 3-Hydroxy-2,4,4-trimethylpentyl<br>2-methylpropanoate | N.D.                            | 21.510±4.828      | 0.151±0.017 | 0.107±0.060 | 0.164±0.067 | 0.093±0.014 | C               |
| <b>Furans</b>    |                     |                     |                                                       |                                 |                   |             |             |             |             |                 |
| 31               | 938                 |                     | 2-Ethylfuran                                          | 0.142±0.078                     | 0.330±0.055       | N.D.        | 0.279±0.08  | 0.395±0.042 | 0.085±0.005 | A               |
| 32               | 1227                |                     | 2-Pentylfuran                                         | 0.098±0.011                     | 0.083±0.015       | 0.063±0.018 | 0.031±0.013 | 0.149±0.025 | 0.022±0.011 | A               |
| <b>Ketones</b>   |                     |                     |                                                       |                                 |                   |             |             |             |             |                 |



|                               |      |      |                         |             |             |             |             |             |             |   |
|-------------------------------|------|------|-------------------------|-------------|-------------|-------------|-------------|-------------|-------------|---|
| 33                            | 886  |      | Butan-2-one             | N.D.        | 0.065±0.016 | N.D.        | N.D.        | N.D.        | N.D.        | A |
| 34                            | 964  |      | Pentan-2-one            | N.D.        | 0.340±0.044 | N.D.        | N.D.        | 0.268±0.078 | N.D.        | A |
| 35                            | 1177 |      | Heptan-2-one            | N.D.        | 0.123±0.013 | N.D.        | N.D.        | N.D.        | N.D.        | A |
| 36                            | 1249 |      | Octan-3-one             | 0.088±0.055 | 2.153±0.083 | 0.140±0.064 | N.D.        | N.D.        | 0.456±0.177 | A |
| <b>Lactones</b>               |      |      |                         |             |             |             |             |             |             |   |
| 37                            | 1598 |      | 4-Methyloxolan-2-one    | 0.270±0.028 | N.D.        | 0.238±0.028 | N.D.        | 0.631±0.133 | N.D.        | C |
| 38                            | 1612 |      | Oxolan-2-one            | 0.468±0.052 | 0.086±0.05  | N.D.        | 0.379±0.102 | 0.701±0.106 | N.D.        | A |
| 39                            | 1686 | 1694 | 5-Ethyloxolan-2-one     | N.D.        | N.D.        | N.D.        | 0.137±0.039 | N.D.        | N.D.        | B |
| <b>N-containing compounds</b> |      |      |                         |             |             |             |             |             |             |   |
| 40                            | <600 |      | N,N-Dimethylmethanamine | N.D.        | N.D.        | N.D.        | N.D.        | 0.023±0.005 | N.D.        | A |
| <b>S-containing compounds</b> |      |      |                         |             |             |             |             |             |             |   |
| 41                            | 1937 |      | 1,3-Benzothiazole       | 0.244±0.138 | 0.322±0.112 | 0.2±0.041   | 0.101±0.01  | 0.295±0.143 | 0.093±0.072 | A |
| <b>Hydrocarbons</b>           |      |      |                         |             |             |             |             |             |             |   |
| 42                            | 800  |      | Octane                  | N.D.        | 0.077±0.024 | N.D.        | 0.036±0.026 | 0.042±0.012 | 0.051±0.011 | A |
| 43                            | 900  | 900  | Nonane                  | N.D.        | 0.068±0.023 | 0.049±0.02  | 0.045±0.018 | N.D.        | 0.042±0.008 | B |
| 44                            | 1000 |      | Decane                  | N.D.        | 0.073±0.077 | N.D.        | N.D.        | 0.158±0.088 | 0.094±0.000 | A |
| 45                            | 1100 |      | Dodecane                | 0.210±0.034 | N.D.        | 0.172±0.024 | 0.092±0.038 | 0.185±0.068 | N.D.        | A |
| 46                            | 1397 | 1400 | Tetradecane             | N.D.        | N.D.        | 0.167±0.093 | 0.194±0.145 | N.D.        | N.D.        | B |
| <b>Terpenes</b>               |      |      |                         |             |             |             |             |             |             |   |
| 47                            | 1165 |      | Cumene                  | N.D.        | N.D.        | N.D.        | 0.061±0.01  | N.D.        | N.D.        | A |
| 48                            | 1188 |      | Limonene                | 0.112±0.048 | N.D.        | 0.095±0.059 | N.D.        | 0.204±0.127 | N.D.        | A |
| <b>Phenols</b>                |      |      |                         |             |             |             |             |             |             |   |
| 49                            | 1956 |      | Phenol                  | N.D.        | N.D.        | N.D.        | 0.046±0.012 | N.D.        | N.D.        | A |
| <b>Pyrazines</b>              |      |      |                         |             |             |             |             |             |             |   |
| 50                            | 1258 | 1263 | 2-Methylpyrazine        | N.D.        | N.D.        | N.D.        | N.D.        | 0.063±0.011 | N.D.        | B |

<sup>1</sup> All volatile metabolites are listed by the order of their RI values; <sup>2</sup> Retention indices were determined using n-alkanes C<sub>6</sub> to C<sub>30</sub> as an external standard; <sup>3</sup> Retention indices were obtained from NIST database(<http://webbook.nist.gov/chemistry>); <sup>4</sup> Mean values of relative peak area to that of internal standard ± standard deviation; <sup>5</sup> Not detected; <sup>6</sup> Identification of the compounds was based as follows; A, mass spectrum and retention index agree with the authentic compounds under similar conditions (positive identification); B, mass spectrum and retention index were consistent with those from NIST database; C, mass spectrum was consistent with that of W9N08 (Wiley and NIST) and manual interpretation (tentative identification); <sup>7</sup> Abbreviation are defined as shown in Table 4.

**Table S4:** The provinces, cities, and geographic coordinates of soybean samples harvested in 2016 from Republic of Korea and China.

|               | No. | Province       | City         | Geographic coordinate |
|---------------|-----|----------------|--------------|-----------------------|
| Korea         | 1   | Gyeonggi       | Anseong      | N37°, E127°           |
|               | 2   | Gyeonggi       | Icheon       | N37°, E127°           |
|               | 3   | Gangwon        | Chuncheon    | N37°, E127°           |
|               | 4   | Gangwon        | Yeongwol     | N37°, E128°           |
|               | 5   | Chungcheongbuk | Eumseong     | N36°, E127°           |
|               | 6   | Chungcheongnam | Cheonan      | N36°, E127°           |
|               | 7   | Chungcheongnam | Gongju       | N36°, E127°           |
|               | 8   | Jeollabuk      | Gimje        | N35°, E127°           |
|               | 9   | Jeollabuk      | Imsil        | N35°, E127°           |
|               | 10  | Jeollanam      | Naju         | N35°, E127°           |
|               | 11  | Jeollanam      | Yeonggwang   | N35°, E127°           |
|               | 12  | Kyeongsangbuk  | Cheongdo     | N36°, E128°           |
|               | 13  | Kyeongsangbuk  | Uiseong      | N36°, E128°           |
|               | 14  | Kyeongsangbuk  | Yeongcheon   | N36°, E128°           |
|               | 15  | Kyeongsangnam  | Changnyeong  | N35°, E128°           |
|               | 16  | Kyeongsangnam  | Miryang      | N35°, E128°           |
|               | 17  | Kyeongsangnam  | Geochang     | N35°, E127°           |
| China         | 1   | Neimenggu      | Ulanhot      | N40°, E111°           |
|               | 2   | Heilongjiang   | Harbin       | N45°, E126°           |
|               | 3   | Jilin          | Meihekou     | N42°, E125°           |
|               | 4   | Liaoning       | Dandong      | N40°, E124°           |
|               | 5   | Hebei          | Shijiazhuang | N38°, E114°           |
|               | 6   | Shandong       | Jining       | N35°, E116°           |
|               | 7   | Anhui          | Huaibei      | N33°, E116°           |
|               | 8   | Hubei          | Huangshi     | N30°, E115°           |
|               | 9   | Zhejiang       | Jiaxing      | N30°, E120°           |
|               | 10  | Jiangxi        | Jiujiang     | N29°, E115°           |
|               | 11  | Fujian         | Longyan      | N25°, E117°           |
|               | 12  | Guangdong      | Shaoguan     | N24°, E113°           |
|               | 13  | Guangxi        | Hechi        | N24°, E108°           |
| North America | 1   | Illinois       |              | N39°, E-89°           |
|               | 2   | Indiana        |              | N39°, E-86°           |
|               | 3   | Minnesota      |              | N45°, E-94°           |
|               | 4   | Michigan       |              | N43°, E-84°           |
|               | 5   | Quebec         |              | N51°, E-72°           |
|               | 6   | Ontario        |              | N51°, E-85°           |

\*Korean soybean samples were provided by the National Agricultural Products Quality Management Service.
